# Supplementary material for: Helicobacter pylori infection and lactose intolerance increase expiratory hydrogen
Source: PubMed Central journal article supplement (PMC8971348; doi:10.17179/excli2021-4508), 2022-02-17
Supplement: EXCLI-21-426-s-001.pdf [file EXCLI-21-426-s-001.pdf]

**Original article:**

**HELICOBACTER PYLORI INFECTION AND  
LACTOSE INTOLERANCE INCREASE EXPIRATORY HYDROGEN**

Wolfgang J. Schnedl<sup>1</sup>, Nathalie Meier-Allard<sup>2</sup>, Michael Schenk<sup>3</sup>, Sonja Lackner<sup>2</sup>,  
Dietmar Enko<sup>4</sup>, Harald Mangge<sup>4</sup>, Sandra J. Holasek<sup>2</sup>

<sup>1</sup> Practice for General Internal Medicine, Dr. Theodor Körnerstrasse 19b,  
A-8600 Bruck/Mur, Austria

<sup>2</sup> Division of Immunology and Pathophysiology, Otto Loewi Research Center, Medical  
University of Graz, Heinrichstrasse 31a, A-8010 Graz, Austria

<sup>3</sup> Das Kinderwunsch Institut Schenk GmbH, Am Sendergrund 11, A-8143 Dobl, Austria

<sup>4</sup> Clinical Institute of Medical and Chemical Laboratory Diagnosis, Medical University of  
Graz, Auenbruggerplatz 30, A-8036 Graz, Austria

\* **Corresponding author:** Dr. Wolfgang J. Schnedl, Professor of Internal Medicine, Practice  
for General Internal Medicine, Dr. Theodor Körnerstrasse 19b, A-8600 Bruck/Mur,  
Austria, Phone: +43-3612-55833, Fax: +43-3612-55833-22,  
E-mail: [w.schnedl@dr-schnedl.at](mailto:w.schnedl@dr-schnedl.at)

<https://dx.doi.org/10.17179/excli2021-4508>

This is an Open Access article distributed under the terms of the Creative Commons Attribution License  
(<http://creativecommons.org/licenses/by/4.0/>).

**Table 1:** Raw data on *H. pylori*-only patients

| Year of birth | Gender<br>w<br>(female)<br>m (male) | <i>H. pylori</i><br>(IU/mL) | DAO<br>(IU/mL) | Lactose<br>breath<br>test | Fasting<br>(ppm) | 30<br>Min | 60<br>Min | 90<br>Min | 120<br>Min | Blood<br>glucose<br>fasting | BG 1<br>(mg%) | BG 2<br>(mg%) | Symptoms           | Fructose<br>breath<br>test | Fasting<br>(ppm) | 30<br>Min | 60<br>Min | 90<br>Min | 120<br>Min | Symptoms | Tissue<br>trans-<br>glutaminase |
|---------------|-------------------------------------|-----------------------------|----------------|---------------------------|------------------|-----------|-----------|-----------|------------|-----------------------------|---------------|---------------|--------------------|----------------------------|------------------|-----------|-----------|-----------|------------|----------|---------------------------------|
| 1972          | w                                   | pos.                        | 18,4           | neg.                      | 2                | 3         | 4         | 9         | 10         | 99                          | 131           | 90            | none               | neg.                       | 1                | 3         | 3         | 18        | 11         | none     | neg.                            |
| 1951          | m                                   | pos.                        | 29,7           | neg.                      | 1                | 1         | 1         | 1         | 0          | 108                         | 132           | 100           | none               | neg.                       | 6                | 4         | 3         | 4         | 3          | none     | neg.                            |
| 1963          | w                                   | pos.                        | 15,8           | neg.                      | 1                | 4         | 6         | 4         | 2          | 86                          | 124           | 106           | none               | neg.                       | 2                | 1         | 2         | 2         | 2          | none     | neg.                            |
| 1967          | w                                   | pos.                        | 16,9           | neg.                      | 2                | 2         | 1         | 1         | 2          | 109                         | 157           | 123           | abdominal<br>pain  | neg.                       | 14               | 10        | 9         | 6         | 6          | none     | neg.                            |
| 1951          | w                                   | pos.                        | 18,9           | neg.                      | 1                | 2         | 1         | 1         | 1          | 89                          | 162           | 121           | none               | neg.                       | 5                | 4         | 2         | 1         | 1          | none     | neg.                            |
| 1960          | w                                   | 85                          | 27,1           | neg.                      | 11               | 12        | 9         | 7         | 13         | 84                          | 148           | 102           | none               | neg.                       | 7                | 5         | 6         | 4         | 3          | none     | neg.                            |
| 1949          | m                                   | 21                          | 20,2           | neg.                      | 1                | 1         | 1         | 1         | 1          | 110                         | 169           | 107           | none               | neg.                       | 2                | 9         | 3         | 2         | 5          | none     | neg.                            |
| 1996          | m                                   | 28                          | 11,7           | neg.                      | 4                | 4         | 6         | 5         | 7          | 86                          | 118           | 81            | none               | neg.                       | 6                | 8         | 4         | 5         | 4          | none     | neg.                            |
| 1968          | m                                   | 49                          | 42,1           | neg.                      | 6                | 6         | 5         | 4         | 4          | 123                         | 150           | 107           | rumbling           | neg.                       | 2                | 2         | 1         | 1         | 2          | none     | neg.                            |
| 1940          | w                                   | pos.                        | 37,7           | neg.                      | 1                | 3         | 1         | 1         | 1          | 92                          | 161           | 112           | none               | neg.                       | 1                | 2         | 3         | 12        | 16         | none     | neg.                            |
| 1953          | w                                   | pos.                        | 28,3           | neg.                      | 3                | 3         | 3         | 3         | 4          | 114                         | 193           | 95            | none               | neg.                       | 1                | 2         | 2         | 2         | 2          | none     | neg.                            |
| 1968          | m                                   | 44                          | 11,8           | neg.                      | 4                | 6         | 4         | 3         | 3          | 108                         | 160           | 133           | none               | neg.                       | 2                | 3         | 2         | 2         | 2          | none     | neg.                            |
| 1957          | m                                   | 42                          | 14,2           | neg.                      | 19               | 20        | 12        | 13        | 15         | 87                          | 115           | 95            | none               | neg.                       | 13               | 14        | 11        | 12        | 9          | none     | neg.                            |
| 1943          | w                                   | 163                         | 24,8           | neg.                      | 2                | 3         | 2         | 4         | 3          | 108                         | 146           | 108           | none               | neg.                       | 3                | 4         | 2         | 3         | 3          | none     | neg.                            |
| 1955          | w                                   | pos.                        | 22,2           | neg.                      | 2                | 3         | 1         | 1         | 0          | 66                          | 128           | 95            | none               | neg.                       | 2                | 3         | 4         | 4         | 4          | none     | neg.                            |
| 1955          | w                                   | 20                          | 11,4           | neg.                      | 0                | 2         | 1         | 0         | 1          | 99                          | 187           | 104           | none               | neg.                       | 3                | 3         | 3         | 3         | 2          | none     | neg.                            |
| 1932          | w                                   | pos.                        | 13,5           | neg.                      | 14               | 11        | 9         | 8         | 6          | 78                          | 128           | 87            | nausea             | neg.                       | 4                | 4         | 3         | 5         | 4          | none     | neg.                            |
| 1964          | m                                   | 31                          | 14,9           | neg.                      | 2                | 2         | 1         | 1         | 1          | 91                          | 118           | 98            | none               | neg.                       | 2                | 3         | 2         | 1         | 1          | none     | neg.                            |
| 1943          | m                                   | 22                          | 16,1           | neg.                      | 2                | 2         | 1         | 2         | 2          | 105                         | 169           | 118           | none               | neg.                       | 1                | 2         | 8         | 6         | 4          | none     | neg.                            |
| 1948          | w                                   | 62                          | 15             | neg.                      | 2                | 3         | 5         | 6         | 6          | 123                         | 145           | 113           | none               | neg.                       | 3                | 3         | 3         | 4         | 5          | none     | neg.                            |
| 1967          | m                                   | pos.                        | 23,8           | neg.                      | 1                | 1         | 1         | 3         | 5          | 104                         | 115           | 91            | none               | neg.                       | 1                | 3         | 11        | 17        | 16         | none     | neg.                            |
| 1948          | w                                   | pos.                        | 11,5           | neg.                      | 8                | 6         | 5         | 6         | 6          | 94                          | 124           | 92            | none               | neg.                       | 1                | 1         | 2         | 2         | 2          | none     | neg.                            |
| 1954          | m                                   | pos.                        | 13,4           | neg.                      | 0                | 1         | 1         | 1         | 3          | 117                         | 154           | 124           | nausea,<br>vertigo | neg.                       | 1                | 10        | 19        | 15        | 16         | none     | neg.                            |
| 1976          | w                                   | 33                          | 17,3           | neg.                      | 1                | 2         | 1         | 1         | 1          | 107                         | 128           | 113           | none               | neg.                       | 1                | 1         | 1         | 1         | 1          | none     | neg.                            |

| Year of birth | Gender w (female) m (male) | <i>H. pylori</i> (IU/mL) | DAO (IU/mL) | Lactose breath test | Fasting (ppm) | 30 Min | 60 Min | 90 Min | 120 Min | Blood glucose fasting | BG 1 (mg%) | BG 2 (mg%) | Symptoms       | Fructose breath test | Fasting (ppm) | 30 Min | 60 Min | 90 Min | 120 Min | Symptoms                         | Tissue trans-glutaminase |
|---------------|----------------------------|--------------------------|-------------|---------------------|---------------|--------|--------|--------|---------|-----------------------|------------|------------|----------------|----------------------|---------------|--------|--------|--------|---------|----------------------------------|--------------------------|
| 1957          | w                          | 21                       | 57,8        | neg.                | 4             | 2      | 0      | 0      | 0       | 102                   | 126        | 106        | none           | neg.                 | 3             | 2      | 0      | 2      | 2       | none                             | neg.                     |
| 1985          | w                          | 26                       | 19,3        | neg.                | 18            | 19     | 14     | 9      | 9       | 90                    | 123        | 89         | none           | neg.                 | 6             | 3      | 2      | 3      | 3       | abdominal pain, nausea           | neg.                     |
| 1949          | w                          | 200                      | 10,1        | neg.                | 2             | 3      | 2      | 1      | 2       | 98                    | 127        | 104        | none           | neg.                 | 2             | 3      | 4      | 6      | 6       | none                             | neg.                     |
| 1956          | w                          | 70                       | 35,8        | neg.                | 2             | 13     | 9      | 5      | 2       | 95                    | 128        | 100        | none           | neg.                 | 1             | 1      | 1      | 1      | 1       | heartburn                        | neg.                     |
| 1979          | w                          | 200                      | 33,2        | neg.                | 2             | 2      | 6      | 2      | 2       | 88                    | 120        | 101        | none           | neg.                 | 1             | 3      | 10     | 7      | 6       | rumbling                         | neg.                     |
| 1959          | m                          | 54                       | 20,4        | neg.                | 2             | 3      | 3      | 3      | 2       | 85                    | 116        | 102        | none           | neg.                 | 4             | 4      | 3      | 4      | 5       | none                             | neg.                     |
| 1944          | m                          | pos.                     | 36,9        | neg.                | 2             | 2      | 1      | 1      | 1       | 103                   | 127        | 101        | none           | neg.                 | 3             | 2      | 1      | 1      | 1       | none                             | neg.                     |
| 1970          | m                          | 21                       | 59,7        | neg.                | 2             | 2      | 2      | 2      | 2       | 77                    | 105        | 90         | abdominal pain | neg.                 | 5             | 7      | 5      | 7      | 9       | none                             | neg.                     |
| 1977          | m                          | 47                       | 19,3        | neg.                | 8             | 4      | 5      | 4      | 3       | 86                    | 119        | 74         | abdominal pain | neg.                 | 3             | 3      | 12     | 7      | 5       | none                             | neg.                     |
| 1990          | m                          | pos.                     | 15          | neg.                | 1             | 2      | 2      | 2      | 1       | 94                    | 119        | 110        | none           | neg.                 | 10            | 9      | 8      | 10     | 14      | bloating, nausea                 | neg.                     |
| 1958          | w                          | 153                      | 19          | neg.                | 4             | 6      | 8      | 6      | 5       | 117                   | 144        | 128        | none           | neg.                 | 1             | 12     | 18     | 8      | 5       | nausea, diarrhea, abdominal pain | neg.                     |
| 1947          | w                          | 169                      | 18,8        | neg.                | 1             | 11     | 10     | 13     | 7       | 149                   | 208        | 185        | none           | neg.                 | 1             | 7      | 13     | 20     | 14      | none                             | neg.                     |
| 1954          | w                          | 30                       | 38          | neg.                | 6             | 3      | 5      | 7      | 5       | 188                   | 322        | 304        | none           | neg.                 | 2             | 1      | 2      | 4      | 3       | none                             | neg.                     |
| 1955          | w                          | 21                       | 48,1        | neg.                | 1             | 2      | 3      | 2      | 2       | 122                   | 186        | 156        | none           | neg.                 | 1             | 7      | 9      | 4      | 6       | nausea, diarrhea                 | neg.                     |
| 1986          | w                          | 21                       | 26,8        | neg.                | 9             | 9      | 6      | 5      | 7       | 96                    | 137        | 108        | none           | neg.                 | 4             | 5      | 2      | 2      | 2       | heartburn                        | neg.                     |
| 1964          | w                          | 69                       | 16,5        | neg.                | 3             | 4      | 2      | 1      | 1       | 83                    | 120        | 85         | headache       | neg.                 | 2             | 1      | 2      | 3      | 2       | none                             | neg.                     |
| 1958          | m                          | 200                      | 14,4        | neg.                | 2             | 2      | 4      | 4      | 2       | 113                   | 143        | 118        | none           | neg.                 | 1             | 3      | 7      | 11     | 12      | none                             | neg.                     |
| 1927          | m                          | 43                       | 13,4        | neg.                | 1             | 3      | 6      | 16     | 11      | 96                    | 130        | 94         | none           | neg.                 | 3             | 8      | 14     | 9      | 9       | none                             | neg.                     |
| 1942          | w                          | 25                       | 38,6        | neg.                | 1             | 5      | 2      | 2      | 1       | 110                   | 131        | 98         | stomach pain   | neg.                 | 2             | 1      | 1      | 1      | 1       | none                             | neg.                     |
| 1977          | m                          | 31                       | 25,2        | neg.                | 8             | 8      | 5      | 4      | 4       | 93                    | 127        | 114        | none           | neg.                 | 3             | 4      | 3      | 3      | 3       | none                             | neg.                     |
| 1993          | w                          | 34                       | 14,2        | neg.                | 3             | 2      | 2      | 2      | 1       | 93                    | 135        | 99         | none           | neg.                 | 15            | 17     | 13     | 15     | 12      | none                             | neg.                     |
| 1947          | w                          | 61                       | 15,9        | neg.                | 3             | 5      | 5      | 7      | 6       | 99                    | 148        | 98         | none           | neg.                 | 11            | 9      | 13     | 6      | 5       | none                             | neg.                     |

| Year of birth | Gender<br>w<br>(female)<br>m (male) | <i>H. pylori</i><br>(IU/mL) | DAO<br>(IU/mL) | Lactose<br>breath<br>test | Fasting<br>(ppm) | 30<br>Min | 60<br>Min | 90<br>Min | 120<br>Min | Blood<br>glucose<br>fasting | BG 1<br>(mg%) | BG 2<br>(mg%) | Symptoms            | Fructose<br>breath<br>test | Fasting<br>(ppm) | 30<br>Min | 60<br>Min | 90<br>Min | 120<br>Min | Symptoms | Tissue<br>trans-<br>glutaminase |
|---------------|-------------------------------------|-----------------------------|----------------|---------------------------|------------------|-----------|-----------|-----------|------------|-----------------------------|---------------|---------------|---------------------|----------------------------|------------------|-----------|-----------|-----------|------------|----------|---------------------------------|
| 1954          | m                                   | 44                          | 20,1           | neg.                      | 7                | 3         | 2         | 2         | 2          | 110                         | 170           | 134           | eczema              | neg.                       | 9                | 12        | 13        | 8         | 6          | none     | neg.                            |
| 1975          | m                                   | 157                         | 14,8           | neg.                      | 8                | 4         | 5         | 2         | 3          | 117                         | 158           | 101           | none                | neg.                       | 6                | 9         | 5         | 4         | 4          | none     | neg.                            |
| 1984          | w                                   | 39                          | 14,4           | neg.                      | 6                | 9         | 7         | 7         | 6          | 93                          | 117           | 105           | headache            | neg.                       | 2                | 3         | 1         | 1         | 1          | none     | neg.                            |
| 1969          | m                                   | 22                          | 16,1           | neg.                      | 3                | 6         | 2         | 3         | 2          | 116                         | 165           | 113           | none                | neg.                       | 2                | 4         | 3         | 3         | 3          | none     | neg.                            |
| 1975          | w                                   | 105                         | 59,4           | neg.                      | 0                | 2         | 2         | 2         | 3          | 107                         | 134           | 109           | none                | neg.                       | 1                | 3         | 1         | 1         | 1          | none     | neg.                            |
| 1964          | w                                   | 39                          | 21,5           | neg.                      | 2                | 3         | 2         | 3         | 1          | 95                          | 162           | 107           | none                | neg.                       | 1                | 5         | 2         | 1         | 1          | none     | neg.                            |
| 1946          | w                                   | 36                          | 29,5           | neg.                      | 8                | 6         | 5         | 6         | 4          | 148                         | 215           | 224           | none                | neg.                       | 10               | 15        | 14        | 8         | 6          | none     | neg.                            |
| 1986          | m                                   | 99                          | 21,1           | neg.                      | 10               | 8         | 3         | 1         | 3          | 135                         | 148           | 112           | abdominal<br>pain   | neg.                       | 2                | 3         | 4         | 7         | 5          | none     | neg.                            |
| 1991          | w                                   | 21                          | 23,4           | neg.                      | 10               | 11        | 13        | 8         | 8          | 94                          | 135           | 100           | none                | neg.                       | 2                | 3         | 3         | 2         | 2          | none     | neg.                            |
| 1979          | m                                   | 28                          | 13,4           | neg.                      | 8                | 7         | 5         | 3         | 4          | 102                         | 165           | 141           | stomach<br>pain     | neg.                       | 2                | 3         | 7         | 7         | 5          | none     | neg.                            |
| 1995          | w                                   | 39                          | 16,7           | neg.                      | 5                | 7         | 7         | 4         | 5          | 111                         | 136           | 115           | nausea,<br>headache | neg.                       | 3                | 4         | 6         | 5         | 5          | none     | neg.                            |
| 1982          | m                                   | 108                         | 17,6           | neg.                      | 2                | 1         | 1         | 1         | 2          | 127                         | 155           | 135           | none                | neg.                       | 11               | 8         | 19        | 15        | 11         | none     | neg.                            |
| 1984          | w                                   | 43                          | 21,9           | neg.                      | 6                | 5         | 3         | 3         | 3          | 99                          | 150           | 101           | rumbling            | neg.                       | 11               | 16        | 19        | 24        | 30         | none     | neg.                            |
| 1975          | w                                   | 132                         | 29,6           | neg.                      | 14               | 13        | 12        | 11        | 18         | 103                         | 127           | 87            | stomach<br>pain     | neg.                       | 16               | 12        | 13        | 14        | 10         | none     | neg.                            |
| 1960          | w                                   | 66                          | 19,7           | neg.                      | 4                | 3         | 4         | 3         | 3          | 116                         | 173           | 97            | none                | neg.                       | 10               | 9         | 12        | 9         | 8          | none     | neg.                            |
| 1946          | w                                   | 94                          | 36,8           | neg.                      | 7                | 12        | 10        | 11        | 9          | 118                         | 175           | 124           | none                | neg.                       | 6                | 5         | 5         | 6         | 4          | none     | neg.                            |
| 1973          | w                                   | 63                          | 57,8           | neg.                      | 2                | 2         | 2         | 11        | 21         | 94                          | 124           | 93            | none                | neg.                       | 3                | 3         | 3         | 5         | 4          | fullness | neg.                            |
| 1988          | w                                   | 40                          | 24,4           | neg.                      | 14               | 11        | 9         | 8         | 6          | 95                          | 125           | 81            | none                | neg.                       | 2                | 2         | 16        | 11        | 5          | none     | neg.                            |
| 1970          | w                                   | 115                         | 10,4           | neg.                      | 2                | 2         | 2         | 2         | 2          | 91                          | 142           | 122           | none                | neg.                       | 2                | 2         | 5         | 3         | 3          | none     | neg.                            |
| 1974          | w                                   | 200                         | 14,5           | neg.                      | 8                | 9         | 3         | 4         | 3          | 85                          | 136           | 99            | none                | neg.                       | 3                | 2         | 2         | 1         | 3          | none     | neg.                            |
| 1970          | w                                   | 44                          | 29,5           | neg.                      | 4                | 2         | 3         | 3         | 3          | 87                          | 133           | 115           | nausea              | neg.                       | 6                | 6         | 4         | 2         | 1          | none     | neg.                            |
| 1974          | w                                   | 103                         | 14,5           | neg.                      | 8                | 9         | 3         | 4         | 3          | 85                          | 136           | 99            | none                | neg.                       | 3                | 2         | 2         | 1         | 3          | none     | neg.                            |
| 1967          | w                                   | 29                          | 15,1           | neg.                      | 0                | 0         | 8         | 4         | 5          | 89                          | 114           | 93            | none                | neg.                       | 0                | 0         | 0         | 0         | 0          | none     | neg.                            |
| 1948          | m                                   | 142                         | 14,1           | neg.                      | 0                | 0         | 1         | 3         | 0          | 207                         | 307           | 315           | none                | neg.                       | 3                | 2         | 0         | 4         | 12         | none     | neg.                            |
| 1975          | w                                   | 58                          | 14,6           | neg.                      | 0                | 0         | 0         | 0         | 0          | 91                          | 135           | 92            | none                | neg.                       | 0                | 0         | 0         | 0         | 0          | none     | neg.                            |

| Year of birth | Gender<br>w (female)<br>m (male) | <i>H. pylori</i><br>(IU/mL) | DAO<br>(IU/mL) | Lactose<br>breath<br>test | Fasting<br>(ppm) | 30<br>Min | 60<br>Min | 90<br>Min | 120<br>Min | Blood<br>glucose<br>fasting | BG 1<br>(mg%) | BG 2<br>(mg%) | Symptoms | Fructose<br>breath<br>test | Fasting<br>(ppm) | 30<br>Min | 60<br>Min | 90<br>Min | 120<br>Min | Symptoms | Tissue<br>trans-<br>glutaminase |
|---------------|----------------------------------|-----------------------------|----------------|---------------------------|------------------|-----------|-----------|-----------|------------|-----------------------------|---------------|---------------|----------|----------------------------|------------------|-----------|-----------|-----------|------------|----------|---------------------------------|
| 1940          | m                                | 200                         | 13,5           | neg.                      | 0                | 11        | 9         | 3         | 4          | 102                         | 133           | 88            | none     | neg.                       | 0                | 8         | 2         | 3         | 3          | diarrhea | neg.                            |
| 1994          | w                                | 145                         | 10,5           | neg.                      | 6                | 6         | 2         | 0         | 0          | 75                          | 100           | 67            | none     | neg.                       | 8                | 1         | 0         | 0         | 0          | none     | neg.                            |
| 1968          | m                                | 200                         | 11,7           | neg.                      | 4                | 2         | 0         | 0         | 0          | 119                         | 171           | 114           | none     | neg.                       | 8                | 5         | 3         | 2         | 1          | none     | neg.                            |
| 1964          | m                                | 26                          | 63,4           | neg.                      | 4                | 9         | 9         | 10        | 6          | 94                          | 129           | 94            | none     | neg.                       | 0                | 2         | 5         | 4         | 0          | none     | neg.                            |
| 1961          | m                                | 83                          | 13,6           | neg.                      | 3                | 6         | 5         | 1         | 0          | 112                         | 147           | 87            | rumbling | neg.                       | 4                | 10        | 7         | 0         | 0          | none     | neg.                            |
| 1944          | w                                | 38                          | 10,9           | neg.                      | 0                | 1         | 4         | 0         | 5          | 89                          | 137           | 131           | headache | neg.                       | 11               | 9         | 24        | 17        | 28         | none     | neg.                            |

**Table 2:** Raw data on *H. pylori* and lactose intolerance patients

| Year of birth | Gender w (female) m (male) | <i>H. pylori</i> (IU/mL) | DAO (IU/mL) | Lactose breath test | Fasting (ppm) | 30 Min | 60 Min | 90 Min | 120 Min | Blood glucose fasting | BG 1 (mg%) | BG 2 (mg%) | Symptoms                 | Fructose breath test | Fasting (ppm) | 30 Min | 60 Min | 90 Min | 120 Min | Symptoms           | Tissue trans-glutaminase |
|---------------|----------------------------|--------------------------|-------------|---------------------|---------------|--------|--------|--------|---------|-----------------------|------------|------------|--------------------------|----------------------|---------------|--------|--------|--------|---------|--------------------|--------------------------|
| 1941          | m                          | POS.                     | 17,4        | pos.                | 1             | 2      | 12     | 50     | 34      | 75                    | 92         | 93         | none                     | neg.                 | 2             | 4      | 8      | 10     | 14      | none               | neg.                     |
| 1975          | w                          | 22                       | 14,8        | pos.                | 1             | 4      | 12     | 49     | 115     | 85                    | 98         | 93         | diarrhea, bloating       | neg.                 | 4             | 3      | 3      | 2      | 2       | none               | neg.                     |
| 1965          | w                          | 36                       | 25,3        | pos.                | 3             | 38     | 104    | 167    | 168     | 96                    | 115        | 115        | diarrhea, bloating       | neg.                 | 5             | 3      | 3      | 2      | 5       | none               | neg.                     |
| 1998          | w                          | POS.                     | 19          | pos.                | 17            | 13     | 17     | 33     | 39      | 114                   | 102        | 97         | nausea, fatigue          | neg.                 | 8             | 3      | 4      | 5      | 7       | none               | neg.                     |
| 1940          | w                          | POS.                     | 31          | pos.                | 1             | 5      | 21     | 62     | 118     | 97                    | 91         | 105        | none                     | neg.                 | 1             | 2      | 1      | 1      | 1       | none               | neg.                     |
| 1979          | m                          | 35                       | 21          | pos.                | 14            | 20     | 15     | 42     | 80      | 105                   | 110        | 106        | none                     | neg.                 | 57            | 25     | 18     | 18     | 15      | none               | neg.                     |
| 1962          | w                          | POS.                     | 13,3        | pos.                | 1             | 5      | 5      | 36     | 110     | 97                    | 110        | 103        | rumbling, abdominal pain | neg.                 | 9             | 8      | 6      | 7      | 3       | abdominal pain     | neg.                     |
| 1936          | m                          | POS.                     | 11,9        | pos.                | 15            | 34     | 18     | 33     | 46      | 110                   | 147        | 116        | none                     | neg.                 | 12            | 13     | 18     | 10     | 9       | none               | n.g.                     |
| 1961          | m                          | 32                       | 13,1        | pos.                | 6             | 15     | 53     | 100    | 180     | 98                    | 127        | 105        | rumbling                 | neg.                 | 2             | 10     | 21     | 18     | 11      | rumbling           | neg.                     |
| 1953          | w                          | 64                       | 11,4        | pos.                | 5             | 20     | 57     | 114    | 200     | 90                    | 101        | 105        | rumbling                 | neg.                 | 6             | 10     | 20     | 12     | 11      | rumbling, hick ups | neg.                     |
| 1963          | w                          | 26                       | 17,4        | pos.                | 2             | 3      | 6      | 23     | 30      | 100                   | 102        | 100        | bloating                 | neg.                 | 2             | 3      | 16     | 19     | 5       | none               | neg.                     |
| 1958          | m                          | 29                       | 14          | pos.                | 3             | 9      | 56     | 74     | 69      | 101                   | 118        | 106        | nausea                   | neg.                 | 1             | 2      | 2      | 1      | 1       | none               | neg.                     |
| 1961          | w                          | 23                       | 18,8        | pos.                | 7             | 12     | 10     | 21     | 142     | 130                   | 137        | 118        | none                     | neg.                 | 5             | 5      | 5      | 3      | 3       | none               | neg.                     |
| 1973          | w                          | 85                       | 10,5        | pos.                | 1             | 17     | 81     | 161    | 163     | 88                    | 111        | 91         | abdominal pain           | neg.                 | 2             | 3      | 2      | 2      | 2       | none               | neg.                     |
| 1979          | m                          | POS.                     | 15,7        | pos.                | 2             | 21     | 62     | 46     | 34      | 110                   | 107        | 115        | rumbling                 | neg.                 | 9             | 6      | 5      | 4      | 4       | none               | neg.                     |
| 1977          | w                          | POS.                     | 20,3        | pos.                | 17            | 21     | 20     | 95     | 126     | 95                    | 101        | 88         | none                     | neg.                 | 7             | 10     | 11     | 7      | 7       | none               | neg.                     |
| 1970          | m                          | POS.                     | 16,1        | pos.                | 6             | 11     | 38     | 223    | 252     | 104                   | 110        | 113        | none                     | neg.                 | 3             | 8      | 11     | 12     | 9       | none               | neg.                     |
| 1940          | w                          | 200                      | 25,4        | pos.                | 1             | 2      | 11     | 24     | 26      | 118                   | 147        | 124        | none                     | neg.                 | 1             | 3      | 1      | 1      | 1       | none               | neg.                     |
| 1941          | m                          | 200                      | 21,3        | pos.                | 3             | 8      | 54     | 101    | 107     | 134                   | 143        | 125        | diarrhea                 | neg.                 | 14            | 10     | 21     | 19     | 20      | none               | neg.                     |
| 1962          | m                          | 200                      | 11          | pos.                | 14            | 10     | 40     | 41     | 150     | 110                   | 108        | 100        | abdominal pain, diarrhea | neg.                 | 7             | 7      | 6      | 6      | 3       | none               | neg.                     |
| 1964          | w                          | 67                       | 25,1        | pos.                | 12            | 11     | 14     | 37     | 106     | 93                    | 106        | 82         | bloating                 | neg.                 | 4             | 8      | 10     | 9      | 6       | none               | neg.                     |
| 1958          | w                          | 20                       | 13,8        | pos.                | 1             | 35     | 71     | 29     | 24      | 97                    | 82         | 95         | none                     | neg.                 | 2             | 9      | 16     | 9      | 3       | none               | neg.                     |
| 1985          | w                          | 67                       | 21,6        | pos.                | 9             | 13     | 9      | 71     | 86      | 77                    | 76         | 87         | none                     | neg.                 | 6             | 8      | 9      | 7      | 5       | none               | neg.                     |
| 1984          | m                          | 83                       | 21,8        | pos.                | 0             | 4      | 10     | 43     | 88      | 77                    | 102        | 85         | nausea, abdominal pain   | neg.                 | 7             | 5      | 4      | 4      | 3       | nausea, vertigo    | neg.                     |
| 1961          | w                          | POS.                     | 29,8        | pos.                | 14            | 20     | 116    | 113    | 228     | 76                    | 91         | 77         | bloating, rumbling       | neg.                 | 5             | 5      | 3      | 6      | 6       | none               | neg.                     |
| 1966          | m                          | 38                       | 17,4        | pos.                | 4             | 20     | 66     | 65     | 63      | 77                    | 89         | 87         | rumbling                 | neg.                 | 3             | 2      | 6      | 4      | 2       | none               | neg.                     |

| Year of birth | Gender w (female) m (male) | H. pylori (IU/mL) | DAO (IU/mL) | Lactose breath test | Fasting (ppm) | 30 Min | 60 Min | 90 Min | 120 Min | Blood glucose fasting | BG 1 (mg%) | BG 2 (mg%) | Symptoms                 | Fructose breath test | Fasting (ppm) | 30 Min | 60 Min | 90 Min | 120 Min | Symptoms       | Tissue trans-glutaminase |
|---------------|----------------------------|-------------------|-------------|---------------------|---------------|--------|--------|--------|---------|-----------------------|------------|------------|--------------------------|----------------------|---------------|--------|--------|--------|---------|----------------|--------------------------|
| 1966          | w                          | POS.              | 80          | pos.                | 6             | 7      | 8      | 21     | 64      | 91                    | 105        | 97         | none                     | neg.                 | 1             | 1      | 1      | 0      | 1       | diarrhea       | neg.                     |
| 1995          | w                          | 30                | 41,4        | pos.                | 1             | 4      | 25     | 42     | 55      | 74                    | 98         | 91         | none                     | neg.                 | 19            | 11     | 10     | 8      | 7       | none           | neg.                     |
| 1966          | w                          | POS.              | 17,2        | pos.                | 13            | 9      | 53     | 77     | 215     | 106                   | 104        | 97         | bloating                 | neg.                 | 3             | 4      | 9      | 8      | 6       | none           | neg.                     |
| 1979          | w                          | POS.              | 13,1        | pos.                | 5             | 7      | 44     | 74     | 194     | 86                    | 99         | 98         | abdominal pain           | neg.                 | 10            | 9      | 15     | 17     | 15      | rumbling       | neg.                     |
| 1965          | w                          | 22                | 32          | pos.                | 7             | 7      | 8      | 11     | 64      | 100                   | 114        | 110        | none                     | neg.                 | 1             | 1      | 1      | 2      | 1       | itchy skin     | neg.                     |
| 1979          | w                          | 22                | 14,5        | pos.                | 3             | 8      | 82     | 95     | 90      | 88                    | 117        | 110        | rumbling                 | neg.                 | 2             | 8      | 3      | 5      | 6       | none           | neg.                     |
| 1965          | w                          | POS.              | 15,2        | pos.                | 3             | 4      | 17     | 17     | 74      | 94                    | 93         | 94         | abdominal pain, diarrhea | neg.                 | 8             | 12     | 10     | 8      | 2       | none           | neg.                     |
| 1979          | m                          | 55                | 34,9        | pos.                | 5             | 3      | 4      | 12     | 59      | 88                    | 102        | 93         | rumbling                 | neg.                 | 3             | 3      | 5      | 6      | 5       | none           | neg.                     |
| 1984          | w                          | 69                | 12,4        | pos.                | 7             | 7      | 13     | 23     | 38      | 97                    | 103        | 94         | bloating                 | neg.                 | 18            | 14     | 16     | 9      | 15      | none           | neg.                     |
| 1974          | w                          | 72                | 16,5        | pos.                | 16            | 22     | 14     | 37     | 98      | 91                    | 101        | 101        | rumbling, nausea         | neg.                 | 4             | 5      | 5      | 5      | 3       | none           | neg.                     |
| 1976          | m                          | 42                | 27,6        | pos.                | 5             | 5      | 5      | 36     | 52      | 123                   | 135        | 116        | none                     | neg.                 | 16            | 18     | 12     | 15     | 11      | none           | neg.                     |
| 1961          | w                          | 71                | 13,3        | pos.                | 3             | 6      | 28     | 34     | 30      | 94                    | 112        | 114        | none                     | neg.                 | 1             | 3      | 5      | 2      | 1       | nausea         | neg.                     |
| 1973          | w                          | 74                | 22,7        | pos.                | 14            | 18     | 29     | 108    | 189     | 100                   | 116        | 119        | none                     | neg.                 | 16            | 15     | 15     | 13     | 15      | none           | neg.                     |
| 1979          | m                          | 30                | 11,1        | pos.                | 13            | 15     | 74     | 83     | 47      | 109                   | 123        | 115        | none                     | neg.                 | 20            | 22     | 28     | 14     | 16      | none           | neg.                     |
| 1974          | m                          | 200               | 22,1        | pos.                | 10            | 22     | 16     | 135    | 116     | 89                    | 114        | 92         | abdominal pain           | neg.                 | 14            | 17     | 19     | 16     | 7       | none           | neg.                     |
| 1968          | m                          | 70                | 75,5        | pos.                | 4             | 14     | 79     | 136    | 127     | 103                   | 108        | 91         | bloating                 | neg.                 | 19            | 19     | 20     | 23     | 15      | fullness       | neg.                     |
| 1971          | w                          | 41                | 16,8        | pos.                | 4             | 2      | 16     | 23     | 31      | 109                   | 139        | 105        | none                     | neg.                 | 4             | 1      | 0      | 0      | 0       | none           | neg.                     |
| 1971          | w                          | 140               | 24          | pos.                | 4             | 31     | 93     | 88     | 102     | 156                   | 166        | 167        | heartburn                | neg.                 | 5             | 17     | 11     | 8      | 9       | abdominal pain | neg.                     |
| 1986          | w                          | 81                | 17,3        | pos.                | 11            | 10     | 34     | 168    | 278     | 104                   | 126        | 112        | abdominal pain, bloating | neg.                 | 6             | 6      | 5      | 20     | 4       | none           | neg.                     |
| 1935          | m                          | 10                | 20,2        | pos.                | 0             | 6      | 51     | 117    | 325     | 129                   | 128        | 121        | gas, empty stomach       | neg.                 | 14            | 15     | 0      | 0      | 0       | none           | neg.                     |
| 1990          | m                          | 60                | 23,2        | pos.                | 9             | 11     | 10     | 73     | 64      | 114                   | 116        | 118        | abdominal pain, diarrhea | neg.                 | 0             | 0      | 0      | 0      | 0       | vertigo        | neg.                     |
| 1974          | w                          | 20                | 11,3        | pos.                | 8             | 6      | 5      | 4      | 2       | 95                    | 90         | 96         | none                     | neg.                 | 13            | 10     | 12     | 7      | 6       | none           | neg.                     |
| 1957          | w                          | POS.              | 26,9        | pos.                | 1             | 1      | 0      | 1      | 1       | 116                   | 115        | 107        | abdominal pain           | neg.                 | 1             | 1      | 1      | 1      | 1       | abdominal pain | neg.                     |
| 1967          | 9                          | POS.              | 12,2        | pos.                | 3             | 3      | 2      | 2      | 1       | 357                   | 312        | 231        | none                     | neg.                 | 16            | 19     | 13     | 15     | 11      | none           | neg.                     |
| 1959          | w                          | POS.              | 14,2        | pos.                | 2             | 4      | 1      | 1      | 2       | 118                   | 102        | 93         | abdominal pain           | neg.                 | 4             | 3      | 3      | 4      | 3       | none           | neg.                     |
| 1982          | m                          | POS.              | 13,1        | pos.                | 4             | 3      | 2      | 1      | 1       | 94                    | 84         | 89         | abdominal pain           | neg.                 | 5             | 5      | 4      | 4      | 5       | none           | neg.                     |

| Year of birth | Gender<br>w (female)<br>m (male) | <i>H. pylori</i><br>(IU/mL) | DAO<br>(IU/mL) | Lactose<br>breath<br>test | Fasting<br>(ppm) | 30<br>Min | 60<br>Min | 90<br>Min | 120<br>Min | Blood<br>glucose<br>fasting | BG 1<br>(mg%) | BG 2<br>(mg%) | Symptoms              | Fructose<br>breath<br>test | Fasting<br>(ppm) | 30<br>Min | 60<br>Min | 90<br>Min | 120<br>Min | Symptoms                       | Tissue<br>trans-<br>glutaminase |
|---------------|----------------------------------|-----------------------------|----------------|---------------------------|------------------|-----------|-----------|-----------|------------|-----------------------------|---------------|---------------|-----------------------|----------------------------|------------------|-----------|-----------|-----------|------------|--------------------------------|---------------------------------|
| 1982          | w                                | 46                          | 11,3           | pos.                      | 3                | 3         | 3         | 1         | 1          | 112                         | 103           | 101           | none                  | neg.                       | 2                | 3         | 3         | 5         | 8          | rumbling                       | neg.                            |
| 1965          | w                                | POS.                        | 11,1           | pos.                      | 2                | 3         | 10        | 20        | 15         | 93                          | 94            | 86            | none                  | neg.                       | 4                | 4         | 6         | 9         | 5          | none                           | neg.                            |
| 1972          | w                                | 34                          | 20,7           | pos.                      | 8                | 9         | 8         | 8         | 7          | 89                          | 81            | 91            | abdominal<br>pain     | neg.                       | 1                | 2         | 1         | 1         | 1          | none                           | neg.                            |
| 1970          | w                                | 84                          | 52             | pos.                      | 4                | 4         | 4         | 3         | 4          | 106                         | 112           | 109           | headache              | neg.                       | 2                | 2         | 2         | 1         | 1          | none                           | neg.                            |
| 1977          | m                                | 72                          | 20,6           | pos.                      | 20               | 13        | 15        | 7         | 5          | 113                         | 123           | 108           | rumbling,<br>diarrhea | neg.                       | 12               | 7         | 5         | 3         | 2          | rumbling                       | neg.                            |
| 1969          | w                                | 126                         | 18,8           | pos.                      | 8                | 8         | 5         | 5         | 4          | 113                         | 114           | 110           | heartburn             | neg.                       | 14               | 13        | 12        | 22        | 28         | abdominal<br>pain,<br>headache | neg.                            |
| 1970          | m                                | POS.                        | 47,7           | pos.                      | 11               | 11        | 9         | 9         | 6          | 102                         | 106           | 96            | throat<br>mucus       | neg.                       | 10               | 6         | 7         | 7         | 5          | none                           | neg.                            |
| 1978          | m                                | 200                         | 37,1           | pos.                      | 1                | 2         | 1         | 1         | 4          | 110                         | 118           | 106           | abdominal<br>pain     | neg.                       | 6                | 7         | 4         | 5         | 7          | abdominal<br>pain              | neg.                            |
| 1984          | w                                | 25                          | 14,7           | pos.                      | 5                | 8         | 6         | 5         | 3          | 94                          | 89            | 86            | abdominal<br>pain     | neg.                       | 5                | 4         | 4         | 4         | 1          | none                           | neg.                            |
| 1968          | w                                | POS.                        | 13,6           | pos.                      | 0                | 0         | 0         | 0         | 1          | 83                          | 80            | 74            | none                  | neg.                       | 0                | 0         | 0         | 0         | 0          | none                           | neg.                            |
| 1973          | w                                | 36                          | 14,8           | pos.                      | 0                | 0         | 0         | 1         | 1          | 104                         | 109           | 87            | abdominal<br>fullness | neg.                       | 5                | 4         | 2         | 2         | 1          | none                           | neg.                            |
| 1986          | m                                | 21                          | 13,4           | pos.                      | 3                | 0         | 7         | 3         | 3          | 99                          | 111           | 99            | none                  | neg.                       | 8                | 6         | 7         | 5         | 3          | none                           | neg.                            |
| 1967          | w                                | 65                          | 16,1           | pos.                      | 3                | 4         | 5         | 5         | 8          | 126                         | 121           | 112           | none                  | neg.                       | 5                | 7         | 11        | 6         | 1          | abdominal<br>pain              | neg.                            |
| 1970          | m                                | 28                          | 13,5           | pos.                      | 20               | 46        | 25        | 44        | 62         | 99                          | 108           | 101           | rumbling              | neg.                       | 8                | 14        | 22        | 20        | 8          | nausea                         | neg.                            |



**Table 3:** Raw data on *H. pylori*-, lactose and histamine intolerant patients

| Year of birth | Gender<br>w (female)<br>m (male) | <i>H. pylori</i><br>(IU/mL) | DAO<br>(IU/mL) | Lactose<br>breath<br>test | Fasting<br>(ppm) | 30<br>Min | 60<br>Min | 90<br>Min | 120<br>Min | Blood<br>glucose<br>fasting | BG 1<br>(mg%) | BG 2<br>(mg%) | Symptoms                       | Fructose<br>breath<br>test | Fasting<br>(ppm) | 30<br>Min | 60<br>Min | 90<br>Min | 120<br>Min | Symptoms                       | Tissue<br>trans-<br>glutaminase |
|---------------|----------------------------------|-----------------------------|----------------|---------------------------|------------------|-----------|-----------|-----------|------------|-----------------------------|---------------|---------------|--------------------------------|----------------------------|------------------|-----------|-----------|-----------|------------|--------------------------------|---------------------------------|
| 1984          | w                                | pos.                        | 9,9            | pos.                      | 17               | 13        | 11        | 38        | 98         | 91                          | 106           | 88            | none                           | neg.                       | 4                | 5         | 6         | 7         | 9          | none                           | neg.                            |
| 1993          | w                                | 38                          | 4              | pos.                      | 13               | 9         | 9         | 19        | 30         | 83                          | 95            | 80            | rumbling                       | neg.                       | 10               | 8         | 9         | 7         | 6          | none                           | neg.                            |
| 1941          | w                                | pos.                        | 7,7            | pos.                      | 2                | 12        | 28        | 40        | 122        | 140                         | 134           | 142           | abdominal<br>pain,<br>bloating | neg.                       | 2                | 2         | 2         | 1         | 2          | none                           | neg.                            |
| 1970          | m                                | 30                          | 8,3            | pos.                      | 4                | 13        | 30        | 15        | 30         | 101                         | 96            | 89            | diarrhea                       | neg.                       | 5                | 23        | 17        | 12        | 11         | none                           | neg.                            |
| 1964          | m                                | 200                         | 8,1            | pos.                      | 7                | 7         | 18        | 34        | 30         | 102                         | 125           | 134           | abdominal<br>pain              | neg.                       | 5                | 13        | 6         | 11        | 9          | none                           | neg.                            |
| 1979          | m                                | pos.                        | 1,5            | pos.                      | 0                | 8         | 21        | 57        | 69         | 73                          | 93            | 83            | none                           | neg.                       | 1                | 2         | 13        | 9         | 9          | none                           | neg.                            |
| 1998          | m                                | 23                          | 8              | pos.                      | 9                | 14        | 5         | 4         | 5          | 110                         | 93            | 82            | none                           | neg.                       | 15               | 17        | 11        | 11        | 9          | none                           | neg.                            |
| 1985          | w                                | 31                          | 7,7            | pos.                      | 17               | 41        | 135       | 45        | 84         | 111                         | 107           | 101           | abdominal<br>pain              | neg.                       | 11               | 11        | 8         | 10        | 4          | rumbling,<br>abdominal<br>pain | neg.                            |
| 1941          | w                                | 22                          | 1,5            | pos.                      | 1                | 1         | 2         | 1         | 1          | 92                          | 92            | 105           | abdominal<br>pain              | neg.                       | 2                | 10        | 18        | 20        | 15         | none                           | neg.                            |
| 1987          | w                                | 20                          | 8,6            | pos.                      | 17               | 22        | 20        | 27        | 46         | 89                          | 113           | 80            | none                           | neg.                       | 1                | 3         | 13        | 19        | 10         | stomach<br>pain                | neg.                            |
| 1981          | w                                | 88                          | 7,2            | pos.                      | 1                | 2         | 2         | 5         | 9          | 113                         | 101           | 95            | diarrhea                       | neg.                       | 2                | 3         | 3         | 1         | 1          | none                           | neg.                            |
| 1986          | w                                | 200                         | 6,1            | pos.                      | 4                | 6         | 6         | 9         | 5          | 104                         | 109           | 94            | none                           | neg.                       | 2                | 3         | 1         | 7         | 11         | none                           | neg.                            |
| 1969          | w                                | 28                          | 4,7            | pos.                      | 4                | 3         | 3         | 3         | 3          | 94                          | 104           | 83            | abdominal<br>pain,<br>bloating | neg.                       | 5                | 4         | 4         | 3         | 2          | none                           | neg.                            |
| 1950          | m                                | 42                          | 6,6            | pos.                      | 1                | 8         | 10        | 15        | 23         | 107                         | 124           | 77            | none                           | neg.                       | 0                | 16        | 18        | 15        | 12         | none                           | neg.                            |
| 1975          | w                                | 35                          | 6,7            | pos.                      | 5                | 6         | 19        | 26        | 40         | 84                          | 92            | 102           | none                           | neg.                       | 11               | 9         | 14        | 10        | 6          | nausea                         | neg.                            |
| 1948          | m                                | pos.                        | 4,3            | pos.                      | 0                | 1         | 0         | 2         | 4          | 107                         | 103           | 112           | none                           | neg.                       | 7                | 7         | 15        | 25        | 9          | none                           | n.g.                            |
| 1981          | m                                | 49                          | 7,1            | pos.                      | 8                | 6         | 18        | 21        | 29         | 82                          | 102           | 95            | none                           | neg.                       | 2                | 5         | 10        | 12        | 10         | none                           | neg.                            |
| 1939          | w                                | pos.                        | 6              | pos.                      | 1                | 2         | 4         | 8         | 15         | 117                         | 107           | 102           | none                           | neg.                       | 5                | 5         | 9         | 10        | 15         | none                           | neg.                            |
| 1938          | w                                | 200                         | 8,9            | pos.                      | 1                | 6         | 20        | 36        | 22         | 93                          | 101           | 99            | none                           | neg.                       | 3                | 4         | 4         | 7         | 10         | none                           | neg.                            |
| 1986          | w                                | 200                         | 8,7            | pos.                      | 17               | 16        | 14        | 11        | 11         | 99                          | 105           | 100           | abdominal<br>pain              | neg.                       | 9                | 10        | 10        | 9         | 4          | abdominal<br>pain,<br>bloating | neg.                            |

| Year of birth | Gender<br>w (female)<br>m (male) | <i>H. pylori</i><br>(IU/mL) | DAO<br>(IU/mL) | Lactose<br>breath<br>test | Fasting<br>(ppm) | 30<br>Min | 60<br>Min | 90<br>Min | 120<br>Min | Blood<br>glucose<br>fasting | BG 1<br>(mg%) | BG 2<br>(mg%) | Symptoms                       | Fructose<br>breath<br>test | Fasting<br>(ppm) | 30<br>Min | 60<br>Min | 90<br>Min | 120<br>Min | Symptoms          | Tissue<br>trans-<br>glutaminase |
|---------------|----------------------------------|-----------------------------|----------------|---------------------------|------------------|-----------|-----------|-----------|------------|-----------------------------|---------------|---------------|--------------------------------|----------------------------|------------------|-----------|-----------|-----------|------------|-------------------|---------------------------------|
| 1987          | w                                | 33                          | 7,3            | pos.                      | 15               | 27        | 69        | 162       | 243        | 96                          | 109           | 103           | nausea,<br>abdominal<br>pain   | neg.                       | 13               | 17        | 18        | 18        | 10         | none              | neg.                            |
| 1991          | w                                | 28                          | 2              | pos.                      | 3                | 1         | 2         | 2         | 2          | 101                         | 109           | 76            | stomach<br>pain,<br>bloating   | neg.                       | 0                | 1         | 1         | 0         | 1          | none              | neg.                            |
| 1976          | m                                | 153                         | 6,9            | pos.                      | 2                | 13        | 80        | 121       | 188        | 93                          | 130           | 99            | abdominal<br>pain,<br>diarrhea | neg.                       | 1                | 4         | 5         | 6         | 7          | none              | neg.                            |
| 1990          | m                                | 200                         | 5,7            | pos.                      | 11               | 14        | 72        | 110       | 81         | 103                         | 98            | 98            | rumbling,<br>burping           | neg.                       | 9                | 15        | 12        | 14        | 5          | rumbling          | neg.                            |
| 1960          | w                                | 200                         | 9,9            | pos.                      | 3                | 5         | 16        | 12        | 11         | 102                         | 99            | 92            | none                           | neg.                       | 5                | 7         | 8         | 4         | 3          | headache          | neg.                            |
| 1977          | m                                | pos.                        | 9,7            | pos.                      | 14               | 10        | 13        | 11        | 5          | 130                         | 128           | 92            | none                           | neg.                       | 2                | 3         | 3         | 2         | 2          | none              | neg.                            |
| 1982          | w                                | 87                          | 7,8            | pos.                      | 6                | 3         | 2         | 2         | 3          | 115                         | 120           | 110           | fatigue                        | neg.                       | 4                | 2         | 5         | 4         | 4          | none              | neg.                            |
| 1990          | w                                | 43                          | 7,5            | pos.                      | 7                | 4         | 20        | 70        | 105        | 91                          | 109           | 104           | bloating,<br>abdominal<br>pain | neg.                       | 23               | 13        | 11        | 8         | 7          | none              | neg.                            |
| 1976          | m                                | 110                         | 7,6            | pos.                      | 7                | 11        | 14        | 12        | 33         | 97                          | 109           | 103           | none                           | neg.                       | 4                | 3         | 3         | 3         | 3          | none              | neg.                            |
| 1974          | m                                | 22                          | 8,2            | pos.                      | 11               | 18        | 10        | 11        | 12         | 109                         | 117           | 111           | none                           | neg.                       | 4                | 4         | 4         | 4         | 2          | none              | neg.                            |
| 1981          | m                                | 22                          | 6,4            | pos.                      | 4                | 2         | 50        | 77        | 43         | 104                         | 111           | 93            | bloating                       | neg.                       | 3                | 8         | 13        | 15        | 21         | none              | neg.                            |
| 1976          | m                                | 200                         | 6,6            | pos.                      | 18               | 46        | 138       | 157       | 152        | 82                          | 152           | 164           | abdominal<br>pain              | neg.                       | 16               | 16        | 17        | 13        | 9          | none              | neg.                            |
| 1958          | m                                | pos.                        | 1,5            | pos.                      | 5                | 2         | 15        | 43        | 41         | 126                         | 186           | 144           | none                           | neg.                       | 10               | 13        | 11        | 6         | 6          | none              | neg.                            |
| 1938          | w                                | 41                          | 4,2            | pos.                      | 2                | 3         | 11        | 30        | 47         | 114                         | 118           | 127           | diarrhea                       | neg.                       | 4                | 9         | 11        | 7         | 4          | none              | neg.                            |
| 1976          | m                                | 200                         | 6,6            | pos.                      | 18               | 46        | 138       | 157       | 152        | 82                          | 152           | 164           | abdominal<br>pain              | neg.                       | 16               | 16        | 17        | 13        | 9          | none              | neg.                            |
| 1994          | w                                | 200                         | 3,2            | pos.                      | 0                | 0         | 25        | 33        | 92         | 87                          | 94            | 86            | abdominal<br>pain              | neg.                       | 0                | 0         | 0         | 13        | 9          | none              | neg.                            |
| 1996          | w                                | 38                          | 5,6            | pos.                      | 8                | 2         | 33        | 59        | 79         | 89                          | 94            | 93            | diarrhea,<br>abdominal<br>pain | neg.                       | 5                | 0         | 0         | 0         | 0          | none              | neg.                            |
| 1958          | w                                | 26                          | 6,4            | pos.                      | 0                | 0         | 0         | 18        | 60         | 88                          | 106           | 96            | none                           | neg.                       | 9                | 9         | 22        | 24        | 10         | abdominal<br>pain | neg.                            |
| 1956          | w                                | 34                          | 5,5            | pos.                      | 1                | 0         | 0         | 0         | 0          | 116                         | 117           | 100           | none                           | neg.                       | 0                | 1         | 6         | 8         | 9          | nausea            | neg.                            |
| 1985          | w                                | 51                          | 2,5            | pos.                      | 4                | 10        | 5         | 2         | 1          | 103                         | 101           | 80            | none                           | neg.                       | 2                | 0         | 9         | 1         | 0          | none              | neg.                            |

| Year of birth | Gender<br>w (female)<br>m (male) | <i>H. pylori</i><br>(IU/mL) | DAO<br>(IU/mL) | Lactose<br>breath<br>test | Fasting<br>(ppm) | 30<br>Min | 60<br>Min | 90<br>Min | 120<br>Min | Blood<br>glucose<br>fasting | BG 1<br>(mg%) | BG 2<br>(mg%) | Symptoms                       | Fructose<br>breath<br>test | Fasting<br>(ppm) | 30<br>Min | 60<br>Min | 90<br>Min | 120<br>Min | Symptoms | Tissue<br>trans-<br>glutaminase |
|---------------|----------------------------------|-----------------------------|----------------|---------------------------|------------------|-----------|-----------|-----------|------------|-----------------------------|---------------|---------------|--------------------------------|----------------------------|------------------|-----------|-----------|-----------|------------|----------|---------------------------------|
| 1970          | m                                | 41                          | 6,4            | pos.                      | 0                | 14        | 65        | 110       | 138        | 92                          | 103           | 71            | abdominal<br>pain              | neg.                       | 4                | 4         | 2         | 1         | 0          | none     | neg.                            |
| 1977          | m                                | 37                          | 8,6            | pos.                      | 7                | 7         | 36        | 103       | 235        | 99                          | 103           | 93            | none                           | neg.                       | 17               | 13        | 9         | 10        | 8          | none     | neg.                            |
| 1966          | w                                | 67                          | 9,2            | pos.                      | 3                | 5         | 203       | 208       | 281        | 92                          | 114           | 80            | bloating,<br>nausea            | neg.                       | 8                | 9         | 10        | 24        | 26         | none     | neg.                            |
| 1977          | w                                | 102                         | 1,6            | pos.                      | 3                | 2         | 52        | 59        | 81         | 109                         | 98            | 98            | bloating,<br>diarrhea          | neg.                       | 12               | 9         | 5         | 7         | 1          | none     | neg.                            |
| 1983          | m                                | 200                         | 5,4            | pos.                      | 8                | 11        | 4         | 13        | 13         | 120                         | 111           | 106           | heartburn                      | neg.                       | 14               | 0         | 0         | 0         | 0          | none     | neg.                            |
| 1980          | m                                | 79                          | 1,6            | pos.                      | 4                | 18        | 5         | 21        | 39         | 126                         | 149           | 142           | none                           | neg.                       | 3                | 0         | 0         | 0         | 0          | none     | neg.                            |
| 1969          | w                                | 51                          | 7,2            | pos.                      | 0                | 2         | 4         | 3         | 0          | 99                          | 104           | 89            | headache                       | neg.                       | 0                | 0         | 0         | 1         | 4          | headache | neg.                            |
| 1968          | w                                | 67                          | 6,1            | pos.                      | 2                | 3         | 3         | 0         | 1          | 77                          | 96            | 93            | abdominal<br>pain              | neg.                       | 0                | 0         | 0         | 0         | 0          | none     | neg.                            |
| 1995          | m                                | 56                          | 5,1            | pos.                      | 0                | 3         | 1         | 29        | 50         | 118                         | 121           | 99            | abdominal<br>pain,<br>diarrhea | neg.                       | 7                | 2         | 0         | 0         | 0          | none     | neg.                            |
| 1943          | w                                | 67                          | 9,9            | pos.                      | 3                | 12        | 10        | 3         | 0          | 109                         | 121           | 91            | none                           | neg.                       | 10               | 13        | 15        | 8         | 10         | none     | neg.                            |
| 1985          | w                                | 75                          | 4,7            | pos.                      | 11               | 10        | 9         | 10        | 7          | 106                         | 101           | 90            | rumbling                       | neg.                       | 7                | 6         | 25        | 7         | 1          | none     | neg.                            |

**Table 4:** Raw data on *H. pylori*-, lactose-, histamine intolerant patients with fructose malabsorption

| Year of birth | Gender<br>w<br>(female)<br>m (male) | <i>H. pylori</i><br>(IU/mL) | DAO<br>(IU/mL) | Lactose<br>breath<br>test | Fasting<br>(ppm) | 30<br>Min | 60<br>Min | 90<br>Min | 120<br>Min | Blood<br>glucose<br>fasting | BG 1<br>(mg%) | BG 2<br>(mg%) | Symptoms                                    | Fructose<br>breath<br>test | Fasting<br>(ppm) | 30<br>Min | 60<br>Min | 90<br>Min | 120<br>Min | Symptoms                           | Tissue<br>trans-<br>glutaminase |
|---------------|-------------------------------------|-----------------------------|----------------|---------------------------|------------------|-----------|-----------|-----------|------------|-----------------------------|---------------|---------------|---------------------------------------------|----------------------------|------------------|-----------|-----------|-----------|------------|------------------------------------|---------------------------------|
| 1979          | w                                   | pos.                        | 6,7            | pos.                      | 5                | 42        | 141       | 130       | 139        | 87                          | 107           | 122           | bloating,<br>abdominal<br>pain              | pos.                       | 4                | 12        | 43        | 32        | 29         | rumbling,<br>bloating,<br>belching | neg.                            |
| 1962          | w                                   | pos.                        | 5,9            | pos.                      | 0                | 1         | 1         | 2         | 24         | 101                         | 111           | 89            | stomach pain                                | pos.                       | 0                | 4         | 52        | 74        | 52         | abdominal<br>pain                  | neg.                            |
| 1960          | w                                   | 100                         | 9,9            | pos.                      | 2                | 4         | 11        | 14        | 30         | 109                         | 137           | 116           | none                                        | pos.                       | 13               | 20        | 40        | 53        | 49         | none                               | neg.                            |
| 1996          | m                                   | 101                         | 8,2            | pos.                      | 12               | 27        | 57        | 90        | 71         | 104                         | 102           | 104           | rumbling,<br>diarrhea                       | pos.                       | 2                | 11        | 48        | 36        | 33         | none                               | neg.                            |
| 1978          | w                                   | 73                          | 9,7            | pos.                      | 5                | 5         | 5         | 4         | 4          | 102                         | 100           | 103           | none                                        | pos.                       | 4                | 6         | 6         | 39        | 32         | none                               | neg.                            |
| 1983          | w                                   | 30                          | 9,2            | pos.                      | 10               | 27        | 27        | 41        | 26         | 93                          | 98            | 92            | diarrhea,<br>abdominal<br>pain              | pos.                       | 5                | 8         | 24        | 27        | 36         | none                               | neg.                            |
| 1997          | w                                   | 86                          | 7,8            | pos.                      | 16               | 19        | 91        | 109       | 173        | 93                          | 102           | 92            | abdominal<br>pain,<br>bloating              | pos.                       | 13               | 36        | 73        | 79        | 61         | abdominal<br>pain,<br>bloating     | neg.                            |
| 1964          | w                                   | 194                         | 2,7            | pos.                      | 13               | 36        | 70        | 115       | 110        | 104                         | 120           | 109           | diarrhea                                    | pos.                       | 8                | 8         | 51        | 13        | 5          | rumbling                           | neg.                            |
| 1963          | w                                   | 20                          | 8,3            | pos.                      | 1                | 5         | 58        | 209       | 109        | 83                          | 118           | 81            | abdominal<br>pain,<br>bloating,<br>headache | pos.                       | 5                | 21        | 92        | 111       | 22         | headache,<br>nausea                | neg.                            |
| 1980          | w                                   | 62                          | 6,9            | pos.                      | 0                | 59        | 268       | 271       | 182        | 90                          | 96            | 88            | abdominal<br>pain,<br>bloating,<br>diarrhea | pos.                       | 6                | 15        | 62        | 42        | 17         | abdominal<br>pain                  | neg.                            |
| 1937          | w                                   | 47                          | 2,1            | pos.                      | 0                | 3         | 3         | 28        | 59         | 86                          | 164           | 99            | abdominal<br>pain                           | pos.                       | 0                | 0         | 23        | 68        | 110        | abdominal<br>pain,<br>headache     | neg.                            |
| 1989          | m                                   | 103                         | 9,4            | pos.                      | 3                | 0         | 1         | 2         | 2          | 112                         | 107           | 122           | vertigo,<br>nausea                          | pos.                       | 11               | 5         | 52        | 29        | 53         | none                               | neg.                            |
| 1995          | w                                   | 200                         | 5,7            | pos.                      | 1                | 0         | 5         | 7         | 26         | 93                          | 123           | 93            | none                                        | pos.                       | 4                | 66        | 113       | 140       | 153        | abdominal<br>pain                  | neg.                            |

**Table 5:** Raw data on *H. pylori* infected patients with fructose malabsorption

| Year of birth | Gender<br>w (female)<br>m (male) | <i>H. pylori</i><br>(IU/mL) | DAO<br>(IU/mL) | Lactose<br>breath<br>test | Fasting<br>(ppm) | 30<br>Min | 60<br>Min | 90<br>Min | 120<br>Min | Blood<br>glucose<br>fasting | BG 1<br>(mg%) | BG 2<br>(mg%) | Symptoms            | Fructose<br>breath<br>test | Fasting<br>(ppm) | 30<br>Min | 60<br>Min | 90<br>Min | 120<br>Min | Symptoms                         | Tissue<br>trans-<br>glutaminase |
|---------------|----------------------------------|-----------------------------|----------------|---------------------------|------------------|-----------|-----------|-----------|------------|-----------------------------|---------------|---------------|---------------------|----------------------------|------------------|-----------|-----------|-----------|------------|----------------------------------|---------------------------------|
| 1994          | w                                | pos.                        | 17,4           | neg.                      | 20               | 16        | 17        | 13        | 9          | 84                          | 112           | 71            | none                | pos.                       | 10               | 11        | 46        | 52        | 48         | none                             | neg.                            |
| 1933          | w                                | pos.                        | 22,5           | neg.                      | 1                | 9         | 4         | 3         | 6          | 129                         | 177           | 135           | none                | pos.                       | 10               | 20        | 26        | 26        | 39         | abdominal<br>pain,<br>nausea     | neg.                            |
| 1964          | w                                | 21                          | 10,7           | neg.                      | 0                | 4         | 3         | 0         | 0          | 88                          | 126           | 69            | none                | pos.                       | 0                | 59        | 138       | 46        | 24         | none                             | neg.                            |
| 1946          | w                                | 200                         | 12,9           | neg.                      | 2                | 2         | 1         | 3         | 3          | 102                         | 148           | 113           | none                | pos.                       | 4                | 45        | 25        | 16        | 19         | belching,<br>vertigo             | neg.                            |
| 1953          | w                                | 40                          | 11,8           | neg.                      | 1                | 2         | 1         | 1         | 2          | 108                         | 152           | 105           | none                | pos.                       | 1                | 20        | 29        | 14        | 13         | nausea,<br>diarrhea,<br>belching | neg.                            |
| 1965          | w                                | 46                          | 11,5           | neg.                      | 3                | 2         | 1         | 1         | 1          | 83                          | 131           | 99            | none                | pos.                       | 3                | 7         | 37        | 35        | 20         | bloating                         | neg.                            |
| 1986          | w                                | 93                          | 13             | neg.                      | 2                | 1         | 3         | 1         | 1          | 99                          | 111           | 97            | none                | pos.                       | 1                | 2         | 23        | 18        | 16         | none                             | neg.                            |
| 1961          | w                                | 25                          | 15,9           | neg.                      | 10               | 8         | 12        | 9         | 10         | 102                         | 166           | 130           | nausea,<br>rumbling | pos.                       | 3                | 6         | 39        | 27        | 36         | rumbling                         | neg.                            |
| 1972          | w                                | 51                          | 17,3           | neg.                      | 6                | 8         | 11        | 6         | 12         | 134                         | 171           | 166           | none                | pos.                       | 8                | 47        | 64        | 69        | 61         | rumbling                         | neg.                            |
| 1957          | w                                | 58                          | 14,6           | neg.                      | 2                | 3         | 3         | 7         | 13         | 97                          | 149           | 102           | heartburn           | pos.                       | 10               | 23        | 95        | 82        | 105        | heartburn,<br>abdominal<br>pain  | neg.                            |
| 1992          | w                                | 27                          | 27,1           | neg.                      | 3                | 5         | 17        | 18        | 15         | 132                         | 143           | 120           | none                | pos.                       | 5                | 3         | 28        | 15        | 7          | fatigue,<br>diarrhea             | neg.                            |
| 1975          | w                                | 22                          | 30             | neg.                      | 1                | 3         | 1         | 2         | 2          | 119                         | 180           | 125           | none                | pos.                       | 4                | 4         | 32        | 38        | 13         | headache                         | neg.                            |
| 1942          | w                                | 83                          | 16,2           | neg.                      | 1                | 1         | 2         | 1         | 5          | 96                          | 149           | 98            | none                | pos.                       | 1                | 9         | 63        | 87        | 83         | diarrhea                         | neg.                            |
| 1979          | m                                | 106                         | 59,6           | neg.                      | 6                | 4         | 3         | 3         | 4          | 104                         | 159           | 103           | none                | pos.                       | 14               | 11        | 49        | 41        | 68         | none                             | neg.                            |
| 1998          | w                                | 168                         | 16,9           | neg.                      | 10               | 7         | 5         | 4         | 8          | 90                          | 145           | 98            | none                | pos.                       | 7                | 22        | 37        | 43        | 43         | headache                         | neg.                            |
| 1962          | m                                | 200                         | 30,6           | neg.                      | 0                | 0         | 0         | 0         | 0          | 102                         | 126           | 98            | none                | pos.                       | 4                | 18        | 45        | 26        | 20         | none                             | neg.                            |
| 1965          | w                                | 200                         | 11,7           | neg.                      | 11               | 12        | 8         | 6         | 6          | 89                          | 117           | 104           | none                | pos.                       | 0                | 45        | 55        | 54        | 68         | fatigue,<br>vertigo              | neg.                            |
| 1968          | m                                | 28                          | 24,8           | neg.                      | 2                | 10        | 11        | 9         | 3          | 84                          | 123           | 88            | none                | pos.                       | 10               | 3         | 48        | 43        | 18         | none                             | neg.                            |

| Year of birth | Gender<br>w (female)<br>m (male) | <i>H. pylori</i><br>(IU/mL) | DAO<br>(IU/mL) | Lactose<br>breath<br>test | Fasting<br>(ppm) | 30<br>Min | 60<br>Min | 90<br>Min | 120<br>Min | Blood<br>glucose<br>fasting | BG 1<br>(mg%) | BG 2<br>(mg%) | Symptoms | Fructose<br>breath<br>test | Fasting<br>(ppm) | 30<br>Min | 60<br>Min | 90<br>Min | 120<br>Min | Symptoms            | Tissue<br>trans-<br>glutaminase |
|---------------|----------------------------------|-----------------------------|----------------|---------------------------|------------------|-----------|-----------|-----------|------------|-----------------------------|---------------|---------------|----------|----------------------------|------------------|-----------|-----------|-----------|------------|---------------------|---------------------------------|
| 1978          | w                                | 34                          | 16,1           | neg.                      | 1                | 3         | 3         | 0         | 0          | 126                         | 171           | 109           | nausea   | pos.                       | 3                | 10        | 45        | 7         | 13         | nausea,<br>diarrhea | neg.                            |
| 1964          | m                                | 40                          | 17,4           | neg.                      | 5                | 2         | 0         | 2         | 3          | 113                         | 135           | 109           | none     | pos.                       | 8                | 12        | 36        | 43        | 67         | none                | neg.                            |
| 1959          | w                                | 38                          | 14,7           | neg.                      | 1                | 2         | 2         | 2         | 1          | 81                          | 95            | 104           | none     | pos.                       | 0                | 3         | 28        | 43        | 45         | headache            | neg.                            |
| 1957          | w                                | 34                          | 11,7           | neg.                      | 5                | 14        | 9         | 4         | 7          | 108                         | 161           | 126           | none     | pos.                       | 18               | 14        | 7         | 56        | 74         | none                | neg.                            |

**Table 6:** Raw data on *H. pylori* infected patients and histamine intolerance with fructose malabsorption

| Year of birth | Gender<br>w (female)<br>m (male) | <i>H. pylori</i><br>(IU/mL) | DAO<br>(IU/mL) | Lactose<br>breath<br>test | Fasting<br>(ppm) | 30<br>Min | 60<br>Min | 90<br>Min | 120<br>Min | Blood<br>glucose<br>fasting | BG 1<br>(mg%) | BG 2<br>(mg%) | Symptoms     | Fructose<br>breath<br>test | Fasting<br>(ppm) | 30<br>Min | 60<br>Min | 90<br>Min | 120<br>Min | Symptoms                | Tissue<br>trans-<br>glutaminase |
|---------------|----------------------------------|-----------------------------|----------------|---------------------------|------------------|-----------|-----------|-----------|------------|-----------------------------|---------------|---------------|--------------|----------------------------|------------------|-----------|-----------|-----------|------------|-------------------------|---------------------------------|
| 1972          | m                                | pos.                        | 1,6            | neg.                      | 3                | 4         | 3         | 2         | 2          | 104                         | 155           | 103           | none         | pos.                       | 2                | 7         | 65        | 59        | 12         | bloating                | neg.                            |
| 1971          | w                                | pos.                        | 1,5            | neg.                      | 19               | 23        | 20        | 17        | 18         | 77                          | 107           | 85            | none         | pos.                       | 17               | 49        | 133       | 94        | 53         | rumbling                | neg.                            |
| 1968          | m                                | 138                         | 9,2            | neg.                      | 4                | 5         | 4         | 3         | 2          | 101                         | 146           | 104           | none         | pos.                       | 3                | 4         | 26        | 15        | 6          | none                    | neg.                            |
| 1941          | w                                | pos.                        | 7,3            | neg.                      | 7                | 11        | 5         | 5         | 5          | 112                         | 178           | 126           | none         | pos.                       | 8                | 15        | 83        | 28        | 10         | nausea                  | neg.                            |
| 1966          | m                                | 24                          | 7,1            | neg.                      | 2                | 1         | 1         | 1         | 0          | 96                          | 164           | 99            | cold fingers | pos.                       | 3                | 13        | 27        | 22        | 29         | bloating,<br>diarrhea   | neg.                            |
| 1952          | w                                | 196                         | 1,5            | neg.                      | 10               | 17        | 2         | 2         | 0          | 90                          | 109           | 83            | none         | pos.                       | 7                | 26        | 78        | 142       | 124        | rumbling                | neg.                            |
| 1977          | m                                | 73                          | 2,4            | neg.                      | 1                | 3         | 2         | 1         | 2          | 93                          | 151           | 101           | none         | pos.                       | 6                | 12        | 23        | 33        | 55         | none                    | neg.                            |
| 1992          | w                                | 40                          | 1,5            | neg.                      | 7                | 9         | 7         | 6         | 5          | 82                          | 97            | 100           | bloating     | pos.                       | 22               | 30        | 37        | 46        | 52         | bloating                | neg.                            |
| 1990          | m                                | 38                          | 10             | neg.                      | 7                | 13        | 8         | 8         | 6          | 89                          | 111           | 102           | none         | pos.                       | 3                | 10        | 37        | 43        | 15         | none                    | neg.                            |
| 1936          | w                                | 40                          | 8,3            | neg.                      | 2                | 7         | 5         | 6         | 13         | 144                         | 172           | 159           | none         | pos.                       | 3                | 16        | 19        | 41        | 20         | belching                | neg.                            |
| 1958          | w                                | pos.                        | 4,1            | neg.                      | 2                | 4         | 3         | 5         | 5          | 93                          | 98            | 107           | none         | pos.                       | 3                | 6         | 4         | 21        | 25         | nausea                  | neg.                            |
| 1962          | w                                | 157                         | 3,3            | neg.                      | 4                | 3         | 4         | 4         | 6          | 106                         | 133           | 100           | none         | pos.                       | 10               | 14        | 91        | 90        | 76         | rumbling                | neg.                            |
| 1942          | m                                | 89                          | 9,8            | neg.                      | 0                | 0         | 1         | 3         | 5          | 96                          | 190           | 130           | none         | pos.                       | 0                | 16        | 19        | 34        | 28         | diarrhea,<br>bloating   | neg.                            |
| 1976          | w                                | 43                          | 2,8            | neg.                      | 1                | 6         | 1         | 1         | 4          | 111                         | 124           | 123           | headache     | pos.                       | 0                | 3         | 42        | 55        | 8          | itchy skin,<br>headache | neg.                            |
| 1949          | w                                | 200                         | 2,3            | neg.                      | 4                | 4         | 5         | 5         | 18         | 122                         | 140           | 116           | none         | pos.                       | 2                | 16        | 68        | 84        | 58         | none                    | neg.                            |
| 1944          | w                                | 53                          | 8,2            | neg.                      | 6                | 12        | 9         | 17        | 9          | 91                          | 150           | 119           | none         | pos.                       | 9                | 17        | 44        | 25        | 27         | vertigo                 | neg.                            |
| 1973          | w                                | 90                          | 4,1            | neg.                      | 1                | 4         | 1         | 2         | 4          | 86                          | 97            | 89            | headache     | pos.                       | 0                | 6         | 59        | 0         | 0          | none                    | neg.                            |
| 1959          | w                                | pos.                        | 2,6            | neg.                      | 5                | 7         | 9         | 2         | 10         | 119                         | 149           | 107           | none         | pos.                       | 9                | 3         | 0         | 7         | 73         | none                    | neg.                            |
| 1955          | w                                | 49                          | 9,2            | neg.                      | 6                | 10        | 0         | 0         | 3          | 117                         | 173           | 127           | headache     | pos.                       | 0                | 6         | 33        | 21        | 22         | rumbling                | neg.                            |
| 1969          | w                                | 200                         | 9,7            | neg.                      | 7                | 6         | 13        | 4         | 2          | 135                         | 161           | 117           | bloating     | pos.                       | 13               | 31        | 59        | 57        | 43         | bloating                | neg.                            |

**Table 7:** Raw data on *H. pylori* infected patients with histamine intolerance

| Year of birth | Gender<br>w<br>(female)<br>m (male) | <i>H. pylori</i><br>(IU/mL) | DAO<br>(IU/mL) | Lactose<br>breath<br>test | Fasting<br>(ppm) | 30<br>Min | 60<br>Min | 90<br>Min | 120<br>Min | Blood<br>glucose<br>fasting | BG 1<br>(mg%) | BG 2<br>(mg%) | Symptoms                    | Fructose<br>breath<br>test | Fasting<br>(ppm) | 30<br>Min | 60<br>Min | 90<br>Min | 120<br>Min | Symptoms | Tissue<br>trans-<br>glutaminase |
|---------------|-------------------------------------|-----------------------------|----------------|---------------------------|------------------|-----------|-----------|-----------|------------|-----------------------------|---------------|---------------|-----------------------------|----------------------------|------------------|-----------|-----------|-----------|------------|----------|---------------------------------|
| 1972          | w                                   | 118                         | 3,1            | neg.                      | 2                | 2         | 2         | 1         | 2          | 80                          | 110           | 106           | none                        | neg.                       | 2                | 1         | 1         | 1         | 1          | none     | neg.                            |
| 1966          | m                                   | pos.                        | 9,1            | neg.                      | 6                | 4         | 3         | 2         | 3          | 130                         | 156           | 90            | none                        | neg.                       | 3                | 3         | 3         | 3         | 2          | none     | neg.                            |
| 1950          | m                                   | pos.                        | 2,6            | neg.                      | 1                | 1         | 1         | 1         | 1          | 142                         | 236           | 222           | none                        | neg.                       | 3                | 3         | 3         | 4         | 1          | none     | neg.                            |
| 1940          | w                                   | 200                         | 5,3            | neg.                      | 1                | 4         | 7         | 6         | 4          | 132                         | 205           | 175           | none                        | neg.                       | 2                | 4         | 3         | 6         | 5          | none     | neg.                            |
| 1958          | w                                   | pos.                        | 8              | neg.                      | 3                | 3         | 1         | 1         | 1          | 96                          | 113           | 92            | none                        | neg.                       | 0                | 0         | 1         | 1         | 0          | none     | neg.                            |
| 1989          | w                                   | 24                          | 9,2            | neg.                      | 9                | 8         | 5         | 5         | 3          | 96                          | 123           | 79            | none                        | neg.                       | 17               | 13        | 14        | 24        | 23         | nausea   | neg.                            |
| 1973          | w                                   | 25                          | 2,8            | neg.                      | 2                | 5         | 6         | 3         | 3          | 83                          | 140           | 105           | none                        | neg.                       | 0                | 1         | 1         | 0         | 1          | none     | neg.                            |
| 1929          | w                                   | 28                          | 2,5            | neg.                      | 1                | 3         | 12        | 15        | 15         | 96                          | 108           | 102           | none                        | neg.                       | 1                | 2         | 1         | 1         | 1          | none     | neg.                            |
| 1958          | w                                   | 85                          | 4,4            | neg.                      | 2                | 1         | 1         | 1         | 1          | 94                          | 115           | 110           | rumbling                    | neg.                       | 3                | 3         | 2         | 3         | 2          | belching | neg.                            |
| 1973          | m                                   | 23                          | 8,8            | neg.                      | 0                | 0         | 0         | 0         | 0          | 100                         | 120           | 95            | none                        | neg.                       | 2                | 1         | 0         | 1         | 1          | none     | neg.                            |
| 1945          | m                                   | 102                         | 5,4            | neg.                      | 2                | 8         | 2         | 0         | 12         | 102                         | 132           | 116           | none                        | neg.                       | 1                | 2         | 3         | 11        | 3          | none     | neg.                            |
| 1990          | w                                   | 28                          | 2,6            | neg.                      | 1                | 1         | 2         | 1         | 1          | 80                          | 143           | 104           | none                        | neg.                       | 1                | 3         | 2         | 2         | 2          | none     | neg.                            |
| 1952          | w                                   | 35                          | 8,1            | neg.                      | 3                | 2         | 3         | 3         | 7          | 117                         | 159           | 131           | none                        | neg.                       | 2                | 4         | 9         | 5         | 2          | none     | neg.                            |
| 1959          | m                                   | pos.                        | 7,8            | neg.                      | 1                | 1         | 1         | 3         | 5          | 112                         | 166           | 105           | rumbling                    | neg.                       | 0                | 5         | 11        | 9         | 6          | diarrhea | neg.                            |
| 1956          | m                                   | 54                          | 1,5            | neg.                      | 2                | 2         | 1         | 1         | 1          | 96                          | 153           | 76            | none                        | neg.                       | 8                | 10        | 14        | 17        | 9          | none     | neg.                            |
| 1969          | w                                   | 49                          | 1,5            | neg.                      | 4                | 3         | 2         | 2         | 1          | 90                          | 132           | 113           | none                        | neg.                       | 1                | 1         | 1         | 0         | 1          | none     | neg.                            |
| 1935          | w                                   | 34                          | 9,6            | neg.                      | 1                | 1         | 1         | 1         | 1          | 112                         | 183           | 156           | none                        | neg.                       | 0                | 2         | 1         | 1         | 1          | none     | neg.                            |
| 1963          | m                                   | pos.                        | 2              | neg.                      | 7                | 5         | 9         | 7         | 4          | 89                          | 129           | 129           | none                        | neg.                       | 12               | 18        | 21        | 18        | 15         | none     | neg.                            |
| 1967          | w                                   | 119                         | 5,8            | neg.                      | 1                | 1         | 1         | 1         | 1          | 88                          | 144           | 96            | abdominal<br>pain           | neg.                       | 1                | 1         | 0         | 1         | 1          | tired    | neg.                            |
| 1951          | m                                   | 36                          | 3,2            | neg.                      | 1                | 5         | 3         | 2         | 2          | 111                         | 128           | 83            | none                        | neg.                       | 2                | 3         | 5         | 4         | 3          | none     | neg.                            |
| 1973          | w                                   | 28                          | 7,9            | neg.                      | 1                | 2         | 2         | 1         | 1          | 98                          | 121           | 84            | none                        | neg.                       | 5                | 10        | 11        | 11        | 8          | bloating | neg.                            |
| 1996          | w                                   | 38                          | 3,1            | neg.                      | 11               | 10        | 4         | 3         | 4          | 82                          | 92            | 108           | none                        | neg.                       | 3                | 3         | 3         | 3         | 2          | none     | neg.                            |
| 1979          | w                                   | 28                          | 6,5            | neg.                      | 2                | 2         | 2         | 2         | 2          | 91                          | 134           | 81            | none                        | neg.                       | 4                | 3         | 4         | 4         | 3          | rumbling | neg.                            |
| 1966          | w                                   | 72                          | 8,7            | neg.                      | 1                | 2         | 1         | 1         | 1          | 122                         | 176           | 160           | none                        | neg.                       | 3                | 8         | 19        | 17        | 7          | none     | neg.                            |
| 1982          | w                                   | 36                          | 9,3            | neg.                      | 7                | 9         | 5         | 4         | 5          | 84                          | 125           | 96            | abdominal<br>pain, diarrhea | neg.                       | 2                | 14        | 12        | 7         | 4          | none     | neg.                            |



| Year of birth | Gender<br>w<br>(female)<br>m (male) | <i>H. pylori</i><br>(IU/mL) | DAO<br>(IU/mL) | Lactose<br>breath<br>test | Fasting<br>(ppm) | 30<br>Min | 60<br>Min | 90<br>Min | 120<br>Min | Blood<br>glucose<br>fasting | BG 1<br>(mg%) | BG 2<br>(mg%) | Symptoms                           | Fructose<br>breath<br>test | Fasting<br>(ppm) | 30<br>Min | 60<br>Min | 90<br>Min | 120<br>Min | Symptoms              | Tissue<br>trans-<br>glutaminase |
|---------------|-------------------------------------|-----------------------------|----------------|---------------------------|------------------|-----------|-----------|-----------|------------|-----------------------------|---------------|---------------|------------------------------------|----------------------------|------------------|-----------|-----------|-----------|------------|-----------------------|---------------------------------|
| 1966          | w                                   | 28                          | 1,5            | neg.                      | 3                | 3         | 2         | 0         | 0          | 110                         | 131           | 101           | none                               | neg.                       | 7                | 11        | 6         | 2         | 2          | none                  | neg.                            |
| 1976          | m                                   | pos.                        | 8,6            | neg.                      | 4                | 4         | 2         | 1         | 2          | 91                          | 128           | 91            | none                               | neg.                       | 1                | 5         | 5         | 4         | 2          | bloating              | neg.                            |
| 1966          | m                                   | 22                          | 1,5            | neg.                      | 1                | 3         | 3         | 2         | 2          | 83                          | 109           | 97            | none                               | neg.                       | 5                | 8         | 7         | 3         | 5          | none                  | neg.                            |
| 1966          | w                                   | 126                         | 4              | neg.                      | 0                | 1         | 1         | 2         | 1          | 95                          | 127           | 104           | none                               | neg.                       | 1                | 1         | 1         | 1         | 1          | nausea                | neg.                            |
| 1996          | m                                   | 25                          | 3,4            | neg.                      | 5                | 3         | 3         | 2         | 2          | 82                          | 109           | 51            | itchy skin,<br>vertigo             | neg.                       | 14               | 13        | 11        | 16        | 16         | itchy skinn           | neg.                            |
| 1973          | w                                   | 28                          | 7,9            | neg.                      | 1                | 2         | 2         | 1         | 1          | 98                          | 121           | 84            | none                               | neg.                       | 5                | 10        | 11        | 11        | 8          | none                  | neg.                            |
| 1965          | w                                   | 52                          | 8,3            | neg.                      | 6                | 3         | 3         | 2         | 2          | 96                          | 118           | 83            | none                               | neg.                       | 7                | 8         | 6         | 10        | 8          | vertigo               | neg.                            |
| 1972          | w                                   | 61                          | 2,2            | neg.                      | 2                | 3         | 1         | 1         | 1          | 78                          | 147           | 111           | none                               | neg.                       | 9                | 16        | 10        | 7         | 4          | abdominal<br>pain     | neg.                            |
| 1973          | w                                   | 41                          | 9,7            | neg.                      | 8                | 8         | 7         | 7         | 5          | 83                          | 131           | 104           | none                               | neg.                       | 3                | 3         | 7         | 6         | 5          | none                  | neg.                            |
| 1987          | w                                   | 26                          | 5,9            | neg.                      | 10               | 12        | 13        | 12        | 8          | 105                         | 142           | 131           | none                               | neg.                       | 9                | 6         | 5         | 7         | 6          | none                  | neg.                            |
| 1972          | w                                   | 108                         | 6,3            | neg.                      | 16               | 14        | 11        | 10        | 25         | 127                         | 149           | 142           | none                               | neg.                       | 6                | 3         | 13        | 7         | 5          | belching,<br>nausea   | neg.                            |
| 1974          | w                                   | 128                         | 4,2            | neg.                      | 4                | 2         | 7         | 2         | 1          | 89                          | 161           | 124           | none                               | neg.                       | 5                | 3         | 2         | 3         | 2          | none                  | neg.                            |
| 1965          | w                                   | pos.                        | 2,8            | neg.                      | 4                | 3         | 5         | 7         | 6          | 107                         | 161           | 119           | nausea,<br>abdominal<br>misfeeling | neg.                       | 7                | 8         | 10        | 11        | 11         | rumbling              | neg.                            |
| 1996          | w                                   | 32                          | 5              | neg.                      | 17               | 18        | 26        | 25        | 27         | 98                          | 112           | 105           | nausea                             | neg.                       | 15               | 20        | 14        | 21        | 14         | stomach<br>misfeeling | neg.                            |
| 1939          | w                                   | 25                          | 9,2            | neg.                      | 6                | 5         | 3         | 2         | 2          | 103                         | 182           | 122           | none                               | neg.                       | 8                | 12        | 28        | 11        | 5          | none                  | neg.                            |
| 1984          | m                                   | 23                          | 6,8            | neg.                      | 3                | 2         | 1         | 1         | 2          | 106                         | 144           | 117           | none                               | neg.                       | 10               | 8         | 7         | 7         | 8          | none                  | neg.                            |
| 1997          | w                                   | 200                         | 5,1            | neg.                      | 12               | 12        | 11        | 9         | 10         | 98                          | 125           | 121           | none                               | neg.                       | 2                | 3         | 2         | 4         | 8          | none                  | neg.                            |
| 1981          | w                                   | 56                          | 5,9            | neg.                      | 2                | 3         | 2         | 1         | 2          | 98                          | 121           | 110           | fatigue                            | neg.                       | 2                | 2         | 2         | 3         | 3          | none                  | neg.                            |
| 1974          | w                                   | 30                          | 2              | neg.                      | 12               | 11        | 8         | 4         | 5          | 80                          | 113           | 91            | none                               | neg.                       | 4                | 2         | 3         | 2         | 3          | nausea,<br>headache   | neg.                            |
| 1937          | w                                   | 200                         | 4,5            | neg.                      | 0                | 0         | 0         | 0         | 0          | 105                         | 151           | 106           | none                               | neg.                       | 0                | 0         | 9         | 9         | 0          | none                  | neg.                            |
| 1982          | m                                   | 80                          | 9              | neg.                      | 3                | 8         | 6         | 6         | 7          | 86                          | 110           | 102           | none                               | neg.                       | 17               | 22        | 23        | 27        | 21         | none                  | neg.                            |
| 1954          | w                                   | 66                          | 4,5            | neg.                      | 4                | 5         | 7         | 5         | 4          | 92                          | 132           | 101           | none                               | neg.                       | 2                | 0         | 0         | 4         | 13         | none                  | neg.                            |
| 1948          | w                                   | 200                         | 4,2            | neg.                      | 0                | 0         | 1         | 1         | 5          | 238                         | 315           | 280           | bloating,<br>belching              | neg.                       | 1                | 3         | 4         | 2         | 0          | none                  | neg.                            |
| 1964          | m                                   | 40                          | 2,7            | neg.                      | 0                | 0         | 0         | 0         | 0          | 94                          | 151           | 81            | belching                           | neg.                       | 1                | 0         | 0         | 0         | 0          | belching              | neg.                            |

| Year of birth | Gender<br>w (female)<br>m (male) | <i>H. pylori</i><br>(IU/mL) | DAO<br>(IU/mL) | Lactose<br>breath<br>test | Fasting<br>(ppm) | 30<br>Min | 60<br>Min | 90<br>Min | 120<br>Min | Blood<br>glucose<br>fasting | BG 1<br>(mg%) | BG 2<br>(mg%) | Symptoms | Fructose<br>breath<br>test | Fasting<br>(ppm) | 30<br>Min | 60<br>Min | 90<br>Min | 120<br>Min | Symptoms | Tissue<br>trans-<br>glutaminase |
|---------------|----------------------------------|-----------------------------|----------------|---------------------------|------------------|-----------|-----------|-----------|------------|-----------------------------|---------------|---------------|----------|----------------------------|------------------|-----------|-----------|-----------|------------|----------|---------------------------------|
| 1970          | w                                | 132                         | 9,1            | neg.                      | 0                | 0         | 0         | 0         | 0          | 97                          | 138           | 88            | bloating | neg.                       | 0                | 0         | 0         | 0         | 0          | none     | neg.                            |
| 1972          | w                                | 42                          | 3,4            | neg.                      | 0                | 0         | 0         | 1         | 1          | 93                          | 140           | 88            | none     | neg.                       | 0                | 0         | 0         | 0         | 0          | none     | neg.                            |
| 1968          | w                                | 28                          | 7              | neg.                      | 10               | 10        | 10        | 6         | 2          | 81                          | 101           | 74            | none     | neg.                       | 8                | 3         | 2         | 0         | 0          | none     | neg.                            |
| 1980          | w                                | 31                          | 6,9            | neg.                      | 1                | 3         | 18        | 9         | 9          | 93                          | 123           | 87            | none     | neg.                       | 8                | 8         | 4         | 4         | 3          | none     | neg.                            |
| 1955          | w                                | 42                          | 2,1            | neg.                      | 9                | 8         | 8         | 6         | 7          | 104                         | 147           | 97            | none     | neg.                       | 10               | 3         | 3         | 3         | 19         | none     | neg.                            |

**Table 8:** Raw data on *H. pylori*-, lactose intolerant patients with fructose malabsorption

| Year of birth | Gender<br>w<br>(female)<br>m (male) | <i>H. pylori</i><br>(IU/mL) | DAO<br>(IU/mL) | Lactose<br>breath<br>test | Fasting<br>(ppm) | 30<br>Min | 60<br>Min | 90<br>Min | 120<br>Min | Blood<br>glucose<br>fasting | BG 1<br>(mg%) | BG 2<br>(mg%) | Symptoms                       | Fructose<br>breath<br>test | Fasting<br>(ppm) | 30<br>Min | 60<br>Min | 90<br>Min | 120<br>Min | Symptoms                         | Tissue<br>trans-<br>glutaminase |
|---------------|-------------------------------------|-----------------------------|----------------|---------------------------|------------------|-----------|-----------|-----------|------------|-----------------------------|---------------|---------------|--------------------------------|----------------------------|------------------|-----------|-----------|-----------|------------|----------------------------------|---------------------------------|
| 1975          | w                                   | 200                         | 71,00          | pos.                      | 0                | 174       | 97        | 156       | 270        | 84                          | 98            | 80            | bloating,<br>abdominal<br>pain | pos.                       | 0                | 12        | 38        | 15        | 17         | bloating,<br>abdominal<br>pain   | neg.                            |
| 1939          | w                                   | pos.                        | 15,50          | pos.                      | 10               | 9         | 7         | 7         | 8          | 104                         | 98            | 67            | none                           | pos.                       | 2                | 1         | 7         | 29        | 10         | diarrhea                         | neg.                            |
| 1986          | w                                   | pos.                        | 16,60          | pos.                      | 2                | 1         | 10        | 90        | 51         | 95                          | 87            | 79            | none                           | pos.                       | 5                | 5         | 12        | 27        | 25         | bloating                         | neg.                            |
| 1959          | w                                   | 200                         | 18,00          | pos.                      | 2                | 3         | 2         | 28        | 114        | 74                          | 95            | 97            | bloating,<br>nausea            | pos.                       | 2                | 11        | 29        | 41        | 60         | nausea,<br>diarrhea,<br>bloating | neg.                            |
| 1984          | m                                   | pos.                        | 16,40          | pos.                      | 6                | 6         | 37        | 108       | 83         | 88                          | 105           | 103           | rumbling                       | pos.                       | 7                | 10        | 23        | 32        | 15         | vertigo                          | neg.                            |
| 1970          | m                                   | 84                          | 12,70          | pos.                      | 13               | 9         | 7         | 7         | 9          | 112                         | 93            | 79            | heartburn                      | pos.                       | 8                | 14        | 30        | 26        | 20         | none                             | neg.                            |
| 1950          | m                                   | 34                          | 19,90          | pos.                      | 3                | 30        | 118       | 133       | 74         | 149                         | 201           | 200           | diarrhea                       | pos.                       | 2                | 12        | 74        | 109       | 78         | diarrhea                         | neg.                            |
| 1958          | w                                   | 65                          | 15,70          | pos.                      | 7                | 9         | 34        | 77        | 59         | 98                          | 106           | 95            | bloating,<br>rumbling          | pos.                       | 9                | 19        | 42        | 48        | 34         | none                             | neg.                            |
| 1941          | m                                   | 52                          | 17,50          | pos.                      | 3                | 5         | 16        | 8         | 15         | 108                         | 114           | 93            | none                           | pos.                       | 2                | 14        | 14        | 46        | 49         | none                             | neg.                            |
| 1976          | w                                   | 34                          | 12,60          | pos.                      | 4                | 4         | 4         | 3         | 2          | 93                          | 86            | 88            | none                           | pos.                       | 2                | 9         | 31        | 21        | 18         | none                             | neg.                            |
| 1962          | w                                   | 48                          | 21,00          | pos.                      | 6                | 9         | 8         | 14        | 19         | 102                         | 111           | 110           | none                           | pos.                       | 4                | 24        | 36        | 25        | 20         | none                             | neg.                            |
| 1961          | w                                   | 98                          | 20,60          | pos.                      | 12               | 92        | 144       | 177       | 126        | 100                         | 110           | 97            | abdominal<br>pain              | pos.                       | 7                | 32        | 40        | 20        | 12         | none                             | neg.                            |
| 1950          | m                                   | 124                         | 19,90          | pos.                      | 3                | 30        | 118       | 133       | 74         | 149                         | 201           | 200           | diarrhea                       | pos.                       | 2                | 12        | 74        | 109       | 78         | diarrhea                         | neg.                            |
| 2002          | w                                   | 200                         | 12,40          | pos.                      | 8                | 37        | 75        | 70        | 106        | 90                          | 106           | 91            | none                           | pos.                       | 10               | 8         | 33        | 44        | 23         | rumbling                         | neg.                            |
| 1983          | m                                   | 164                         | 17,00          | pos.                      | 31               | 28        | 50        | 72        | 133        | 102                         | 101           | 107           | none                           | pos.                       | 33               | 71        | 45        | 119       | 101        | rumbling                         | neg.                            |
| 1965          | w                                   | 36                          | 13,10          | pos.                      | 6                | 5         | 6         | 29        | 46         | 85                          | 111           | 117           | bloating                       | pos.                       | 5                | 13        | 55        | 27        | 23         | none                             | neg.                            |
| 1967          | w                                   | 40                          | 30,90          | pos.                      | 4                | 7         | 25        | 29        | 18         | 89                          | 166           | 155           | none                           | pos.                       | 6                | 25        | 68        | 101       | 30         | none                             | neg.                            |
| 1995          | m                                   | 200                         | 13,20          | pos.                      | 41               | 141       | 215       | 128       | 125        | 98                          | 101           | 101           | diarrhea                       | pos.                       | 11               | 23        | 30        | 26        | 23         | none                             | neg.                            |

| Year of birth | Gender<br>w (female)<br>m (male) | <i>H. pylori</i><br>(IU/mL) | DAO<br>(IU/mL) | Lactose<br>breath<br>test | Fasting<br>(ppm) | 30<br>Min | 60<br>Min | 90<br>Min | 120<br>Min | Blood<br>glucose<br>fasting | BG 1<br>(mg%) | BG 2<br>(mg%) | Symptoms                                    | Fructose<br>breath<br>test | Fasting<br>(ppm) | 30<br>Min | 60<br>Min | 90<br>Min | 120<br>Min | Symptoms                         | Tissue<br>trans-<br>glutaminase |
|---------------|----------------------------------|-----------------------------|----------------|---------------------------|------------------|-----------|-----------|-----------|------------|-----------------------------|---------------|---------------|---------------------------------------------|----------------------------|------------------|-----------|-----------|-----------|------------|----------------------------------|---------------------------------|
| 1964          | w                                | 200                         | 28,80          | pos.                      | 1                | 3         | 0         | 1         | 0          | 98                          | 107           | 91            | none                                        | pos.                       | 3                | 4         | 10        | 24        | 28         | headache                         | neg.                            |
| 1981          | w                                | pos.                        | 22,70          | pos.                      | 7                | 107       | 239       | 288       | 358        | 98                          | 100           | 90            | headache                                    | pos.                       | 0                | 14        | 23        | 11        | 9          | none                             | neg.                            |
| 1970          | w                                | pos.                        | 14,7           | pos.                      | 10               | 16        | 13        | 13        | 14         | 85                          | 101           | 91            | none                                        | pos.                       | 13               | 17        | 14        | 16        | 46         | bloating                         | n.g.                            |
| 1975          | w                                | 200                         | 13,2           | pos.                      | 1                | 3         | 3         | 2         | 1          | 97                          | 112           | 109           | none                                        | pos.                       | 7                | 1         | 6         | 17        | 27         | abdominal<br>pain                | n.g.                            |
| 2003          | w                                | 40                          | 28,20          | pos.                      | 12               | 4         | 0         | 5         | 0          | 109                         | 120           | 115           | none                                        | pos.                       | 37               | 17        | 32        | 33        | 60         | none                             | neg.                            |
| 1979          | w                                | 90                          | 12,80          | pos.                      | 4                | 3         | 37        | 23        | 45         | 113                         | 161           | 150           | abdominal<br>pain,<br>bloating,<br>headache | pos.                       | 8                | 51        | 88        | 77        | 71         | headache,<br>nausea,<br>belching | neg.                            |
| 1981          | m                                | pos.                        | 35,10          | pos.                      | 10               | 16        | 41        | 45        | 37         | 113                         | 125           | 89            | eczema                                      | pos.                       | 3                | 3         | 43        | 22        | 23         | none                             | neg.                            |

**Table 9:** Raw data on lactose intolerant patients

| Year of birth | Gender<br>w<br>(female)<br>m (male) | <i>H. pylori</i><br>(IU/mL) | DAO<br>(IU/mL) | Lactose<br>breath<br>test | Fasting<br>(ppm) | 30<br>Min | 60<br>Min | 90<br>Min | 120<br>Min | Blood<br>glucose<br>fasting | BG 1<br>(mg%) | BG 2<br>(mg%) | Symptoms                     | Fructose<br>breath<br>test | Fasting<br>(ppm) | 30<br>Min | 60<br>Min | 90<br>Min | 120<br>Min | Symptoms                       | Tissue<br>trans-<br>glutaminase |
|---------------|-------------------------------------|-----------------------------|----------------|---------------------------|------------------|-----------|-----------|-----------|------------|-----------------------------|---------------|---------------|------------------------------|----------------------------|------------------|-----------|-----------|-----------|------------|--------------------------------|---------------------------------|
| 1983          | m                                   | neg.                        | 34,1           | pos.                      | 9                | 9         | 7         | 7         | 6          | 117                         | 120           | 105           | none                         | neg.                       | 6                | 5         | 4         | 4         | 2          | none                           | neg.                            |
| 1953          | w                                   | neg.                        | 18,9           | pos.                      | 5                | 10        | 20        | 44        | 65         | 131                         | 148           | 130           | bloating                     | neg.                       | 4                | 7         | 5         | 3         | 2          | none                           | neg.                            |
| 1956          | m                                   | neg.                        | 18,4           | pos.                      | 9                | 10        | 56        | 115       | 90         | 124                         | 132           | 137           | none                         | neg.                       | 3                | 3         | 2         | 2         | 1          | none                           | neg.                            |
| 1990          | m                                   | neg.                        | 15.1           | pos.                      | 8                | 3         | 2         | 1         | 1          | 116                         | 117           | 101           | none                         | neg.                       | 5                | 3         | 8         | 7         | 3          | none                           | neg.                            |
| 1993          | m                                   | neg.                        | 10,2           | pos.                      | 5                | 2         | 2         | 3         | 3          | 115                         | 94            | 94            | fullness                     | neg.                       | 1                | 1         | 1         | 1         | 1          | none                           | neg.                            |
| 1970          | w                                   | neg.                        | 38,1           | pos.                      | 3                | 40        | 83        | 71        | 71         | 108                         | 99            | 123           | stomach<br>pain,<br>bloating | neg.                       | 10               | 23        | 17        | 29        | 12         | bloating,<br>abdominal<br>pain | neg.                            |
| 1969          | w                                   | neg.                        | 22,1           | pos.                      | 0                | 1         | 2         | 21        | 22         | 123                         | 140           | 138           | rumbling                     | neg.                       | 7                | 7         | 9         | 8         | 8          | none                           | neg.                            |
| 1951          | m                                   | neg.                        | 21,2           | pos.                      | 6                | 5         | 17        | 24        | 31         | 101                         | 126           | 78            | none                         | neg.                       | 2                | 4         | 15        | 7         | 7          | none                           | neg.                            |
| 1964          | m                                   | neg.                        | 21,9           | pos.                      | 7                | 4         | 7         | 3         | 46         | 103                         | 98            | 96            | none                         | neg.                       | 7                | 8         | 3         | 2         | 3          | none                           | neg.                            |
| 1968          | m                                   | neg.                        | 20,9           | pos.                      | 1                | 17        | 36        | 42        | 55         | 92                          | 107           | 106           | none                         | neg.                       | 2                | 2         | 3         | 1         | 2          | none                           | neg.                            |
| 1969          | w                                   | neg.                        | 20,3           | pos.                      | 3                | 3         | 10        | 50        | 76         | 140                         | 126           | 121           | bloating                     | neg.                       | 11               | 10        | 13        | 9         | 11         | none                           | neg.                            |
| 1955          | m                                   | neg.                        | 10,5           | pos.                      | 5                | 9         | 17        | 53        | 66         | 99                          | 108           | 97            | none                         | neg.                       | 2                | 7         | 7         | 5         | 2          | none                           | neg.                            |
| 1985          | w                                   | neg.                        | 63,7           | pos.                      | 4                | 10        | 5         | 8         | 26         | 83                          | 104           | 74            | none                         | neg.                       | 4                | 4         | 2         | 2         | 2          | none                           | neg.                            |
| 1972          | w                                   | neg.                        | 12             | pos.                      | 7                | 6         | 22        | 50        | 67         | 80                          | 102           | 95            | diarrhea,<br>bloating        | neg.                       | 9                | 6         | 5         | 4         | 5          | none                           | neg.                            |
| 1985          | m                                   | neg.                        | 17,8           | pos.                      | 3                | 100       | 66        | 89        | 106        | 101                         | 115           | 96            | bloating                     | neg.                       | 6                | 13        | 22        | 12        | 4          | none                           | neg.                            |
| 1959          | m                                   | neg.                        | 21,6           | pos.                      | 2                | 23        | 43        | 42        | 67         | 125                         | 130           | 130           | rumbling                     | neg.                       | 5                | 8         | 11        | 17        | 17         | none                           | neg.                            |
| 1956          | w                                   | neg.                        | 18             | pos.                      | 3                | 4         | 4         | 9         | 39         | 123                         | 126           | 109           | abdominal<br>pain            | neg.                       | 3                | 4         | 3         | 2         | 2          | bloating                       | neg.                            |
| 1967          | m                                   | neg.                        | 12,1           | pos.                      | 5                | 8         | 48        | 66        | 104        | 97                          | 104           | 111           | bloating                     | neg.                       | 11               | 9         | 9         | 8         | 10         | none                           | neg.                            |
| 1942          | m                                   | neg.                        | 34,7           | pos.                      | 6                | 8         | 8         | 38        | 60         | 111                         | 115           | 108           | bloating                     | neg.                       | 2                | 3         | 2         | 2         | 3          | none                           | neg.                            |
| 1997          | m                                   | neg.                        | 18,6           | pos.                      | 10               | 12        | 57        | 42        | 67         | 84                          | 100           | 96            | none                         | neg.                       | 7                | 6         | 7         | 10        | 17         | none                           | neg.                            |
| 1969          | w                                   | neg.                        | 15,6           | pos.                      | 3                | 6         | 6         | 12        | 26         | 87                          | 101           | 80            | none                         | neg.                       | 6                | 7         | 4         | 10        | 8          | none                           | neg.                            |
| 1971          | w                                   | neg.                        | 26,9           | pos.                      | 1                | 1         | 1         | 18        | 46         | 97                          | 104           | 97            | none                         | neg.                       | 1                | 2         | 1         | 1         | 1          | nausea                         | neg.                            |

| Year of birth | Gender<br>w<br>(female)<br>m (male) | <i>H. pylori</i><br>(IU/mL) | DAO<br>(IU/mL) | Lactose<br>breath<br>test | Fasting<br>(ppm) | 30<br>Min | 60<br>Min | 90<br>Min | 120<br>Min | Blood<br>glucose<br>fasting | BG 1<br>(mg%) | BG 2<br>(mg%) | Symptoms                            | Fructose<br>breath<br>test | Fasting<br>(ppm) | 30<br>Min | 60<br>Min | 90<br>Min | 120<br>Min | Symptoms | Tissue<br>trans-<br>glutaminase |
|---------------|-------------------------------------|-----------------------------|----------------|---------------------------|------------------|-----------|-----------|-----------|------------|-----------------------------|---------------|---------------|-------------------------------------|----------------------------|------------------|-----------|-----------|-----------|------------|----------|---------------------------------|
| 1991          | w                                   | neg.                        | 21,2           | pos.                      | 9                | 20        | 87        | 107       | 62         | 85                          | 92            | 87            | abdominal<br>pain,<br>bloating      | neg.                       | 2                | 2         | 2         | 1         | 2          | none     | neg.                            |
| 1973          | w                                   | neg.                        | 18,4           | pos.                      | 1                | 9         | 26        | 55        | 160        | 103                         | 90            | 109           | fullness,<br>heartburn,<br>bloating | neg.                       | 11               | 10        | 9         | 6         | 5          | none     | neg.                            |
| 1959          | w                                   | neg.                        | 13,1           | pos.                      | 2                | 1         | 11        | 66        | 80         | 94                          | 102           | 107           | none                                | neg.                       | 1                | 2         | 1         | 1         | 1          | none     | neg.                            |
| 1996          | w                                   | neg.                        | 31,8           | pos.                      | 6                | 3         | 67        | 84        | 140        | 89                          | 109           | 98            | rumbling                            | neg.                       | 2                | 4         | 11        | 7         | 5          | none     | neg.                            |
| 1991          | w                                   | neg.                        | 11,4           | pos.                      | 9                | 11        | 20        | 61        | 152        | 101                         | 99            | 100           | rumbling,<br>belching,<br>bloating  | neg.                       | 10               | 11        | 10        | 7         | 7          | none     | neg.                            |
| 1971          | w                                   | neg.                        | 30,5           | pos.                      | 2                | 0         | 16        | 13        | 30         | 79                          | 98            | 88            | headache                            | neg.                       | 2                | 1         | 5         | 7         | 4          | none     | neg.                            |
| 1958          | w                                   | neg.                        | 13,8           | pos.                      | 1                | 35        | 71        | 29        | 24         | 97                          | 82            | 95            | none                                | neg.                       | 2                | 9         | 16        | 9         | 3          | diarrhea | neg.                            |
| 1952          | w                                   | neg.                        | 22,7           | pos.                      | 9                | 10        | 8         | 140       | 116        | 101                         | 93            | 96            | none                                | neg.                       | 2                | 3         | 2         | 1         | 1          | none     | neg.                            |
| 1954          | w                                   | neg.                        | 15,5           | pos.                      | 2                | 3         | 9         | 23        | 50         | 88                          | 114           | 126           | none                                | neg.                       | 1                | 1         | 1         | 1         | 1          | none     | neg.                            |
| 1936          | w                                   | neg.                        | 44,2           | pos.                      | 1                | 2         | 19        | 30        | 24         | 87                          | 106           | 99            | diarrhea,<br>stomach<br>pain        | neg.                       | 1                | 6         | 8         | 6         | 4          | none     | neg.                            |
| 1951          | m                                   | neg.                        | 62,5           | pos.                      | 3                | 5         | 21        | 168       | 200        | 102                         | 109           | 91            | bloating                            | neg.                       | 4                | 5         | 5         | 4         | 17         | none     | n.g.                            |
| 1968          | m                                   | neg.                        | 26,6           | pos.                      | 22               | 18        | 41        | 54        | 72         | 149                         | 158           | 152           | strange<br>stomach<br>feeling       | neg.                       | 13               | 17        | 9         | 10        | 9          | none     | neg.                            |
| 1940          | w                                   | neg.                        | 25,4           | pos.                      | 1                | 2         | 11        | 24        | 26         | 118                         | 147           | 124           | none                                | neg.                       | 1                | 3         | 1         | 1         | 1          | none     | neg.                            |
| 1974          | w                                   | neg.                        | 12             | pos.                      | 2                | 3         | 10        | 34        | 45         | 99                          | 86            | 85            | abdominal<br>pain                   | neg.                       | 2                | 2         | 3         | 7         | 5          | none     | neg.                            |
| 1954          | w                                   | neg.                        | 16,7           | pos.                      | 7                | 93        | 116       | 118       | 219        | 85                          | 87            | 101           | abdominal<br>pain                   | neg.                       | 1                | 10        | 21        | 18        | 16         | none     | neg.                            |
| 1986          | w                                   | neg.                        | 16,2           | pos.                      | 1                | 6         | 15        | 35        | 39         | 78                          | 99            | 99            | belching                            | neg.                       | 2                | 4         | 2         | 1         | 1          | none     | neg.                            |
| 1959          | w                                   | neg.                        | 15,4           | pos.                      | 1                | 16        | 82        | 86        | 59         | 98                          | 107           | 106           | none                                | neg.                       | 1                | 10        | 13        | 15        | 7          | none     | neg.                            |
| 1963          | w                                   | neg.                        | 20,7           | pos.                      | 10               | 17        | 53        | 65        | 76         | 95                          | 114           | 102           | diarrhea,<br>fullness               | neg.                       | 7                | 6         | 18        | 24        | 18         | none     | neg.                            |
| 1967          | w                                   | neg.                        | 11,2           | pos.                      | 4                | 3         | 2         | 7         | 39         | 88                          | 103           | 103           | none                                | neg.                       | 2                | 3         | 2         | 1         | 1          | none     | neg.                            |
| 1976          | m                                   | neg.                        | 15             | pos.                      | 1                | 2         | 35        | 40        | 38         | 86                          | 107           | 118           | rumbling                            | neg.                       | 10               | 8         | 5         | 4         | 3          | none     | neg.                            |
| 1987          | w                                   | neg.                        | 16,9           | pos.                      | 7                | 9         | 28        | 23        | 29         | 89                          | 112           | 95            | rumbling                            | neg.                       | 2                | 2         | 3         | 2         | 2          | none     | neg.                            |

| Year of birth | Gender<br>w (female)<br>m (male) | <i>H. pylori</i><br>(IU/mL) | DAO<br>(IU/mL) | Lactose<br>breath<br>test | Fasting<br>(ppm) | 30<br>Min | 60<br>Min | 90<br>Min | 120<br>Min | Blood<br>glucose<br>fasting | BG 1<br>(mg%) | BG 2<br>(mg%) | Symptoms                           | Fructose<br>breath<br>test | Fasting<br>(ppm) | 30<br>Min | 60<br>Min | 90<br>Min | 120<br>Min | Symptoms | Tissue<br>trans-<br>glutaminase |
|---------------|----------------------------------|-----------------------------|----------------|---------------------------|------------------|-----------|-----------|-----------|------------|-----------------------------|---------------|---------------|------------------------------------|----------------------------|------------------|-----------|-----------|-----------|------------|----------|---------------------------------|
| 1963          | m                                | neg.                        | 10,4           | pos.                      | 1                | 5         | 14        | 21        | 45         | 107                         | 137           | 99            | none                               | neg.                       | 10               | 11        | 11        | 7         | 3          | none     | neg.                            |
| 1991          | w                                | neg.                        | 16,1           | pos.                      | 9                | 14        | 31        | 61        | 61         | 85                          | 111           | 97            | rumbling                           | neg.                       | 7                | 7         | 10        | 6         | 3          | none     | neg.                            |
| 1984          | w                                | neg.                        | 20,3           | pos.                      | 6                | 5         | 7         | 8         | 62         | 102                         | 117           | 102           | stomach<br>pain                    | neg.                       | 4                | 3         | 6         | 9         | 6          | none     | neg.                            |
| 1990          | m                                | neg.                        | 13             | pos.                      | 5                | 8         | 7         | 6         | 28         | 96                          | 114           | 109           | none                               | neg.                       | 16               | 13        | 20        | 24        | 13         | none     | neg.                            |
| 1998          | m                                | neg.                        | 13,8           | pos.                      | 12               | 20        | 50        | 85        | 59         | 93                          | 104           | 95            | bloating,<br>abdominal<br>pain     | neg.                       | 4                | 11        | 15        | 11        | 8          | none     | neg.                            |
| 1945          | w                                | neg.                        | 16,1           | pos.                      | 1                | 2         | 3         | 42        | 61         | 106                         | 117           | 107           | rumbling,<br>bloating              | neg.                       | 4                | 3         | 3         | 3         | 3          | none     | neg.                            |
| 1986          | w                                | neg.                        | 11,2           | pos.                      | 5                | 36        | 127       | 58        | 58         | 89                          | 98            | 100           | rumbling,<br>bloating              | neg.                       | 5                | 5         | 5         | 4         | 3          | none     | neg.                            |
| 1988          | w                                | neg.                        | 65,7           | pos.                      | 14               | 16        | 15        | 20        | 48         | 82                          | 93            | 83            | headache,<br>abdominal<br>pain     | neg.                       | 7                | 6         | 3         | 3         | 3          | none     | neg.                            |
| 1936          | w                                | neg.                        | 22,4           | pos.                      | 2                | 5         | 27        | 56        | 123        | 130                         | 164           | 176           | nausea                             | neg.                       | 1                | 3         | 6         | 4         | 2          | none     | neg.                            |
| 1996          | m                                | neg.                        | 20,6           | pos.                      | 0                | 5         | 31        | 34        | 65         | 87                          | 85            | 71            | stomach<br>pain                    | neg.                       | 7                | 10        | 11        | 9         | 12         | none     | neg.                            |
| 1964          | m                                | neg.                        | 16,3           | pos.                      | 7                | 7         | 9         | 6         | 40         | 100                         | 129           | 107           | none                               | neg.                       | 7                | 6         | 4         | 5         | 5          | none     | neg.                            |
| 1975          | w                                | neg.                        | 24,8           | pos.                      | 3                | 163       | 88        | 179       | 188        | 98                          | 105           | 117           | rumbling,<br>diarrhea              | neg.                       | 13               | 14        | 24        | 16        | 9          | none     | neg.                            |
| 1976          | m                                | neg.                        | 12,2           | pos.                      | 1                | 1         | 5         | 11        | 30         | 124                         | 133           | 127           | rumbling                           | neg.                       | 2                | 2         | 2         | 2         | 2          | none     | neg.                            |
| 1973          | w                                | neg.                        | 18,8           | pos.                      | 6                | 9         | 97        | 108       | 243        | 108                         | 105           | 104           | rumbling,<br>abdominal<br>pain     | neg.                       | 4                | 7         | 8         | 5         | 4          | none     | neg.                            |
| 1967          | m                                | neg.                        | 10,7           | pos.                      | 5                | 6         | 15        | 16        | 45         | 95                          | 129           | 101           | stomach<br>pain                    | neg.                       | 4                | 4         | 4         | 3         | 2          | none     | neg.                            |
| 1983          | m                                | neg.                        | 13,5           | pos.                      | 2                | 8         | 46        | 60        | 97         | 99                          | 119           | 111           | abdominal<br>pain                  | neg.                       | 2                | 3         | 7         | 7         | 10         | none     | neg.                            |
| 1940          | m                                | neg.                        | 37,3           | pos.                      | 3                | 5         | 33        | 30        | 28         | 83                          | 135           | 115           | diarrhea                           | neg.                       | 5                | 5         | 9         | 4         | 2          | none     | neg.                            |
| 1939          | w                                | neg.                        | 13,8           | pos.                      | 11               | 6         | 9         | 29        | 35         | 105                         | 115           | 100           | rumbling,<br>diarrhea              | neg.                       | 3                | 7         | 10        | 8         | 6          | diarrhea | neg.                            |
| 1980          | w                                | neg.                        | 13,7           | pos.                      | 12               | 8         | 9         | 31        | 36         | 95                          | 88            | 95            | rumbling,<br>diarrhea,<br>headache | neg.                       | 10               | 10        | 11        | 12        | 9          | headache | neg.                            |

| Year of birth | Gender w (female) m (male) | <i>H. pylori</i> (IU/mL) | DAO (IU/mL) | Lactose breath test | Fasting (ppm) | 30 Min | 60 Min | 90 Min | 120 Min | Blood glucose fasting | BG 1 (mg%) | BG 2 (mg%) | Symptoms                         | Fructose breath test | Fasting (ppm) | 30 Min | 60 Min | 90 Min | 120 Min | Symptoms               | Tissue trans-glutaminase |
|---------------|----------------------------|--------------------------|-------------|---------------------|---------------|--------|--------|--------|---------|-----------------------|------------|------------|----------------------------------|----------------------|---------------|--------|--------|--------|---------|------------------------|--------------------------|
| 1996          | w                          | neg.                     | 21,4        | pos.                | 3             | 30     | 156    | 131    | 159     | 92                    | 105        | 95         | bloating, nausea                 | neg.                 | 14            | 11     | 11     | 21     | 28      | nausea, abdominal pain | neg.                     |
| 1996          | w                          | neg.                     | 10,8        | pos.                | 4             | 4      | 3      | 10     | 60      | 124                   | 150        | 98         | abdominal pain                   | neg.                 | 2             | 3      | 2      | 2      | 4       | none                   | neg.                     |
| 1962          | w                          | neg.                     | 21,5        | pos.                | 3             | 24     | 110    | 112    | 102     | 129                   | 146        | 122        | bloating, rumbling               | neg.                 | 4             | 3      | 4      | 5      | 3       | none                   | neg.                     |
| 1943          | w                          | neg.                     | 17          | pos.                | 2             | 4      | 6      | 24     | 110     | 121                   | 133        | 121        | stomach pain, rumbling           | neg.                 | 2             | 4      | 18     | 15     | 9       | none                   | neg.                     |
| 1979          | w                          | neg.                     | 11,4        | pos.                | 5             | 5      | 27     | 73     | 74      | 104                   | 114        | 120        | abdominal pain                   | neg.                 | 14            | 16     | 20     | 18     | 16      | stomach pain           | neg.                     |
| 1979          | m                          | neg.                     | 19,2        | pos.                | 8             | 8      | 7      | 8      | 35      | 93                    | 96         | 90         | rumbling                         | neg.                 | 15            | 10     | 8      | 8      | 6       | belching               | neg.                     |
| 1977          | m                          | neg.                     | 32,7        | pos.                | 23            | 32     | 33     | 66     | 60      | 116                   | 128        | 111        | abdominal pain, diarrhea         | neg.                 | 15            | 10     | 11     | 11     | 10      | none                   | neg.                     |
| 1967          | w                          | neg.                     | 10,9        | pos.                | 17            | 16     | 40     | 85     | 101     | 103                   | 112        | 106        | stomach pain                     | neg.                 | 5             | 6      | 7      | 4      | 5       | none                   | neg.                     |
| 1991          | m                          | neg.                     | 23,3        | pos.                | 5             | 8      | 15     | 60     | 112     | 100                   | 127        | 106        | bloating, rumbling, diarrhea     | neg.                 | 10            | 9      | 12     | 10     | 11      | none                   | neg.                     |
| 1990          | m                          | neg.                     | 17,3        | pos.                | 12            | 67     | 77     | 103    | 91      | 104                   | 116        | 107        | rumbling, bloating               | neg.                 | 1             | 1      | 1      | 1      | 1       | none                   | neg.                     |
| 1963          | m                          | neg.                     | 61,7        | pos.                | 1             | 2      | 33     | 59     | 47      | 86                    | 100        | 107        | stomach pain                     | neg.                 | 2             | 10     | 11     | 7      | 4       | none                   | neg.                     |
| 1964          | w                          | neg.                     | 14,1        | pos.                | 15            | 11     | 7      | 20     | 41      | 123                   | 137        | 118        | diarrhea, bloating, throat mucus | neg.                 | 13            | 9      | 11     | 12     | 11      | none                   | neg.                     |
| 1941          | w                          | neg.                     | 13,7        | pos.                | 1             | 10     | 14     | 13     | 50      | 142                   | 155        | 156        | headache                         | neg.                 | 5             | 7      | 7      | 3      | 2       | headache               | neg.                     |
| 1961          | w                          | neg.                     | 28,6        | pos.                | 1             | 1      | 22     | 41     | 43      | 86                    | 110        | 112        | bloating                         | neg.                 | 11            | 7      | 9      | 7      | 6       | none                   | neg.                     |
| 1999          | m                          | neg.                     | 13,6        | pos.                | 11            | 10     | 9      | 34     | 98      | 93                    | 119        | 114        | none                             | neg.                 | 5             | 8      | 8      | 6      | 9       | none                   | neg.                     |
| 1994          | m                          | neg.                     | 16,9        | pos.                | 5             | 5      | 9      | 29     | 103     | 85                    | 94         | 101        | bloating                         | neg.                 | 2             | 3      | 3      | 3      | 3       | none                   | neg.                     |
| 1986          | w                          | neg.                     | 11,3        | pos.                | 13            | 25     | 73     | 90     | 62      | 79                    | 105        | 89         | stomach pain, bloating, rumbling | neg.                 | 4             | 3      | 3      | 3      | 2       | nausea                 | neg.                     |
| 1985          | w                          | neg.                     | 23,6        | pos.                | 10            | 9      | 7      | 12     | 64      | 94                    | 110        | 106        | none                             | neg.                 | 11            | 15     | 12     | 10     | 11      | none                   | neg.                     |



| Year of birth | Gender<br>w (female)<br>m (male) | <i>H. pylori</i><br>(IU/mL) | DAO<br>(IU/mL) | Lactose<br>breath<br>test | Fasting<br>(ppm) | 30<br>Min | 60<br>Min | 90<br>Min | 120<br>Min | Blood<br>glucose<br>fasting | BG 1<br>(mg%) | BG 2<br>(mg%) | Symptoms                                    | Fructose<br>breath<br>test | Fasting<br>(ppm) | 30<br>Min | 60<br>Min | 90<br>Min | 120<br>Min | Symptoms           | Tissue<br>trans-<br>glutaminase |
|---------------|----------------------------------|-----------------------------|----------------|---------------------------|------------------|-----------|-----------|-----------|------------|-----------------------------|---------------|---------------|---------------------------------------------|----------------------------|------------------|-----------|-----------|-----------|------------|--------------------|---------------------------------|
| 1964          | w                                | neg.                        | 16,2           | pos.                      | 10               | 7         | 20        | 52        | 64         | 94                          | 104           | 96            | abdominal<br>pain                           | neg.                       | 10               | 9         | 9         | 6         | 6          | none               | neg.                            |
| 1962          | w                                | neg.                        | 24,8           | pos.                      | 3                | 4         | 44        | 88        | 143        | 106                         | 114           | 111           | diarrhea                                    | neg.                       | 8                | 10        | 17        | 10        | 8          | none               | neg.                            |
| 1989          | w                                | neg.                        | 20,8           | pos.                      | 0                | 0         | 41        | 112       | 124        | 84                          | 97            | 87            | rumbling                                    | neg.                       | 4                | 2         | 0         | 0         | 0          | none               | neg.                            |
| 1981          | w                                | neg.                        | 27,8           | pos.                      | 11               | 6         | 7         | 22        | 32         | 105                         | 182           | 109           | none                                        | neg.                       | 20               | 10        | 14        | 4         | 1          | headache           | neg.                            |
| 1951          | m                                | neg.                        | 23,1           | pos.                      | 11               | 59        | 23        | 7         | 0          | 108                         | 116           | 97            | hunger                                      | neg.                       | 3                | 4         | 5         | 0         | 0          | rumbling           | neg.                            |
| 1971          | m                                | neg.                        | 15,6           | pos.                      | 0                | 3         | 11        | 25        | 31         | 99                          | 107           | 112           | bloating,<br>rumbling                       | neg.                       | 2                | 2         | 1         | 2         | 0          | none               | neg.                            |
| 2005          | w                                | neg.                        | 10,7           | pos.                      | 2                | 3         | 12        | 66        | 57         | 101                         | 86            | 90            | abdominal<br>pain                           | neg.                       | 2                | 8         | 15        | 10        | 1          | none               | neg.                            |
| 1966          | w                                | neg.                        | 13,2           | pos.                      | 0                | 1         | 19        | 65        | 59         | 105                         | 105           | 95            | bloating                                    | neg.                       | 0                | 0         | 0         | 0         | 0          | none               | neg.                            |
| 1960          | m                                | neg.                        | 20,2           | pos.                      | 0                | 2         | 2         | 15        | 37         | 107                         | 133           | 105           | none                                        | neg.                       | 4                | 1         | 4         | 11        | 7          | none               | neg.                            |
| 1997          | w                                | neg.                        | 17,8           | pos.                      | 6                | 8         | 13        | 77        | 70         | 95                          | 84            | 102           | headache,<br>abdominal<br>pain,<br>rumbling | neg.                       | 10               | 9         | 7         | 7         | 4          | none               | neg.                            |
| 1980          | w                                | neg.                        | 12,8           | pos.                      | 0                | 3         | 8         | 65        | 159        | 76                          | 102           | 91            | bloating                                    | neg.                       | 5                | 17        | 12        | 7         | 12         | none               | neg.                            |
| 1991          | m                                | neg.                        | 16,6           | pos.                      | 10               | 13        | 11        | 72        | 123        | 95                          | 85            | 75            | bloating                                    | neg.                       | 15               | 9         | 5         | 3         | 3          | none               | neg.                            |
| 1992          | m                                | neg.                        | 10,6           | pos.                      | 0                | 12        | 55        | 69        | 60         | 96                          | 98            | 89            | abdominal<br>pain                           | neg.                       | 2                | 3         | 4         | 2         | 4          | none               | neg.                            |
| 1965          | w                                | neg.                        | 15,6           | pos.                      | 13               | 12        | 29        | 52        | 46         | 96                          | 135           | 88            | bloating                                    | neg.                       | 13               | 8         | 16        | 6         | 22         | none               | neg.                            |
| 1977          | m                                | neg.                        | 20,1           | pos.                      | 13               | 15        | 30        | 79        | 72         | 108                         | 111           | 112           | none                                        | neg.                       | 5                | 22        | 8         | 4         | 3          | abdominal<br>pain  | neg.                            |
| 1988          | w                                | neg.                        | 11,9           | pos.                      | 9                | 0         | 3         | 32        | 75         | 99                          | 97            | 98            | abdominal<br>pain,<br>vertigo               | neg.                       | 2                | 4         | 4         | 4         | 4          | vertigo            | neg.                            |
| 1999          | m                                | neg.                        | 24,2           | pos.                      | 3                | 0         | 73        | 315       | 129        | 90                          | 122           | 101           | vertigo,<br>tired                           | neg.                       | 8                | 0         | 0         | 0         | 0          | none               | neg.                            |
| 1972          | m                                | neg.                        | 24             | pos.                      | 1                | 1         | 3         | 0         | 0          | 99                          | 105           | 110           | none                                        | neg.                       | 2                | 2         | 2         | 1         | 1          | none               | neg.                            |
| 1988          | w                                | neg.                        | 20,6           | pos.                      | 7                | 4         | 3         | 5         | 4          | 86                          | 83            | 75            | none                                        | neg.                       | 6                | 8         | 6         | 4         | 4          | none               | neg.                            |
| 1979          | w                                | neg.                        | 10,9           | pos.                      | 2                | 2         | 3         | 2         | 5          | 103                         | 104           | 90            | bloating                                    | neg.                       | 5                | 4         | 2         | 5         | 1          | bloating,<br>tired | neg.                            |
| 1979          | w                                | neg.                        | 21,4           | pos.                      | 3                | 3         | 2         | 2         | 2          | 82                          | 92            | 92            | none                                        | neg.                       | 3                | 4         | 11        | 16        | 12         | none               | neg.                            |
| 1969          | m                                | neg.                        | 22,5           | pos.                      | 3                | 3         | 1         | 1         | 1          | 110                         | 107           | 106           | none                                        | neg.                       | 5                | 4         | 6         | 4         | 5          | none               | neg.                            |

| Year of birth | Gender w (female) m (male) | <i>H. pylori</i> (IU/mL) | DAO (IU/mL) | Lactose breath test | Fasting (ppm) | 30 Min | 60 Min | 90 Min | 120 Min | Blood glucose fasting | BG 1 (mg%) | BG 2 (mg%) | Symptoms                 | Fructose breath test | Fasting (ppm) | 30 Min | 60 Min | 90 Min | 120 Min | Symptoms           | Tissue trans-glutaminase |
|---------------|----------------------------|--------------------------|-------------|---------------------|---------------|--------|--------|--------|---------|-----------------------|------------|------------|--------------------------|----------------------|---------------|--------|--------|--------|---------|--------------------|--------------------------|
| 1968          | w                          | neg.                     | 18,6        | pos.                | 6             | 4      | 3      | 2      | 4       | 89                    | 106        | 104        | none                     | neg.                 | 2             | 1      | 1      | 1      | 1       | none               | neg.                     |
| 1990          | w                          | neg.                     | 19,2        | pos.                | 3             | 3      | 2      | 2      | 5       | 82                    | 92         | 98         | none                     | neg.                 | 11            | 18     | 7      | 5      | 3       | belching, bloating | neg.                     |
| 1990          | w                          | neg.                     | 21,2        | pos.                | 10            | 6      | 6      | 6      | 4       | 93                    | 95         | 90         | none                     | neg.                 | 7             | 9      | 8      | 9      | 13      | stomach pain       | neg.                     |
| 1987          | w                          | neg.                     | 10,2        | pos.                | 5             | 4      | 7      | 5      | 6       | 95                    | 96         | 82         | nausea                   | neg.                 | 4             | 6      | 3      | 2      | 1       | nausea             | neg.                     |
| 1965          | w                          | neg.                     | 14          | pos.                | 4             | 5      | 2      | 3      | 2       | 93                    | 99         | 98         | none                     | neg.                 | 3             | 3      | 7      | 4      | 1       | none               | neg.                     |
| 1964          | w                          | neg.                     | 15,4        | pos.                | 0             | 1      | 2      | 1      | 1       | 105                   | 115        | 92         | abdominal pain, headache | neg.                 | 4             | 3      | 3      | 2      | 2       | none               | neg.                     |
| 1988          | w                          | neg.                     | 13,5        | pos.                | 3             | 4      | 3      | 3      | 2       | 99                    | 103        | 85         | diarrhea, bloating       | neg.                 | 15            | 19     | 14     | 10     | 6       | none               | n.g.                     |
| 1957          | m                          | neg.                     | 17,3        | pos.                | 2             | 7      | 11     | 6      | 13      | 118                   | 127        | 124        | none                     | neg.                 | 4             | 7      | 4      | 2      | 2       | diarrhea           | neg.                     |
| 1985          | w                          | neg.                     | 12,7        | pos.                | 4             | 4      | 3      | 2      | 4       | 77                    | 86         | 84         | none                     | neg.                 | 4             | 4      | 4      | 4      | 3       | none               | neg.                     |
| 1988          | w                          | neg.                     | 14,2        | pos.                | 3             | 3      | 7      | 21     | 23      | 103                   | 117        | 107        | none                     | neg.                 | 3             | 4      | 3      | 4      | 3       | none               | neg.                     |
| 1987          | m                          | neg.                     | 18,7        | pos.                | 4             | 3      | 2      | 3      | 2       | 105                   | 108        | 95         | none                     | neg.                 | 13            | 16     | 14     | 12     | 7       | none               | neg.                     |
| 1975          | m                          | neg.                     | 12,4        | pos.                | 5             | 5      | 3      | 2      | 2       | 96                    | 105        | 100        | none                     | neg.                 | 1             | 1      | 1      | 1      | 1       | none               | neg.                     |
| 1990          | w                          | neg.                     | 12,8        | pos.                | 2             | 2      | 1      | 2      | 1       | 83                    | 89         | 93         | none                     | neg.                 | 5             | 5      | 5      | 4      | 3       | none               | neg.                     |
| 1948          | m                          | neg.                     | 10,6        | pos.                | 2             | 3      | 2      | 3      | 3       | 105                   | 112        | 102        | none                     | neg.                 | 6             | 10     | 7      | 6      | 4       | none               | neg.                     |
| 1995          | w                          | neg.                     | 24,1        | pos.                | 2             | 2      | 13     | 21     | 20      | 89                    | 89         | 90         | belching                 | neg.                 | 4             | 3      | 3      | 10     | 13      | none               | neg.                     |
| 1971          | m                          | neg.                     | 16,2        | pos.                | 5             | 3      | 3      | 12     | 15      | 96                    | 101        | 105        | abdominal pain           | neg.                 | 2             | 2      | 2      | 1      | 1       | none               | neg.                     |
| 1982          | m                          | neg.                     | 11          | pos.                | 3             | 5      | 5      | 3      | 2       | 113                   | 115        | 95         | none                     | neg.                 | 3             | 2      | 3      | 3      | 2       | none               | neg.                     |
| 1991          | w                          | neg.                     | 38,3        | pos.                | 11            | 12     | 9      | 14     | 12      | 87                    | 87         | 97         | tired, abdominal pain    | neg.                 | 15            | 13     | 13     | 15     | 13      | tired, nausea      | neg.                     |
| 1985          | w                          | neg.                     | 24,2        | pos.                | 3             | 3      | 2      | 2      | 2       | 92                    | 95         | 97         | abdominal pain           | neg.                 | 9             | 12     | 9      | 11     | 7       | none               | neg.                     |
| 1958          | w                          | neg.                     | 14,3        | pos.                | 3             | 2      | 2      | 2      | 1       | 96                    | 106        | 102        | bloating, diarrhea       | neg.                 | 3             | 2      | 3      | 4      | 4       | none               | neg.                     |
| 1997          | w                          | neg.                     | 20          | pos.                | 8             | 4      | 5      | 4      | 5       | 106                   | 107        | 98         | nausea                   | neg.                 | 10            | 15     | 20     | 14     | 18      | none               | neg.                     |
| 1985          | m                          | neg.                     | 15,8        | pos.                | 1             | 2      | 1      | 2      | 2       | 105                   | 97         | 113        | none                     | neg.                 | 6             | 10     | 7      | 6      | 6       | none               | neg.                     |
| 1964          | m                          | neg.                     | 24,9        | pos.                | 3             | 2      | 2      | 4      | 21      | 113                   | 117        | 101        | none                     | neg.                 | 1             | 2      | 1      | 1      | 1       | none               | neg.                     |

| Year of birth | Gender w (female) m (male) | <i>H. pylori</i> (IU/mL) | DAO (IU/mL) | Lactose breath test | Fasting (ppm) | 30 Min | 60 Min | 90 Min | 120 Min | Blood glucose fasting | BG 1 (mg%) | BG 2 (mg%) | Symptoms                 | Fructose breath test | Fasting (ppm) | 30 Min | 60 Min | 90 Min | 120 Min | Symptoms           | Tissue trans-glutaminase |
|---------------|----------------------------|--------------------------|-------------|---------------------|---------------|--------|--------|--------|---------|-----------------------|------------|------------|--------------------------|----------------------|---------------|--------|--------|--------|---------|--------------------|--------------------------|
| 1985          | w                          | neg.                     | 11,2        | pos.                | 4             | 3      | 3      | 2      | 2       | 97                    | 99         | 99         | heartburn                | neg.                 | 16            | 15     | 21     | 28     | 18      | none               | neg.                     |
| 1957          | w                          | neg.                     | 28,1        | pos.                | 5             | 6      | 4      | 5      | 9       | 88                    | 98         | 90         | none                     | neg.                 | 3             | 3      | 3      | 3      | 5       | none               | neg.                     |
| 1939          | m                          | neg.                     | 29,3        | pos.                | 1             | 1      | 1      | 1      | 1       | 103                   | 112        | 111        | rumbling                 | neg.                 | 2             | 1      | 3      | 7      | 5       | none               | neg.                     |
| 1974          | m                          | neg.                     | 12,3        | pos.                | 3             | 2      | 4      | 9      | 6       | 109                   | 113        | 110        | none                     | neg.                 | 3             | 2      | 3      | 2      | 2       | none               | neg.                     |
| 1950          | w                          | neg.                     | 13,6        | pos.                | 2             | 2      | 1      | 6      | 2       | 86                    | 81         | 81         | none                     | neg.                 | 1             | 1      | 15     | 15     | 4       | none               | neg.                     |
| 1947          | w                          | neg.                     | 51,6        | pos.                | 3             | 3      | 4      | 8      | 14      | 109                   | 119        | 117        | nausea, vertigo          | neg.                 | 3             | 3      | 4      | 8      | 14      | none               | neg.                     |
| 1981          | w                          | neg.                     | 13,9        | pos.                | 10            | 10     | 6      | 6      | 5       | 102                   | 108        | 89         | none                     | neg.                 | 10            | 6      | 6      | 4      | 3       | none               | neg.                     |
| 1961          | m                          | neg.                     | 14,3        | pos.                | 4             | 6      | 10     | 8      | 15      | 140                   | 110        | 129        | rumbling, abdominal pain | neg.                 | 4             | 4      | 4      | 4      | 4       | none               | neg.                     |
| 1952          | m                          | neg.                     | 13,5        | pos.                | 2             | 4      | 2      | 5      | 4       | 124                   | 107        | 99         | none                     | neg.                 | 1             | 2      | 4      | 3      | 2       | none               | neg.                     |
| 1980          | w                          | neg.                     | 16,1        | pos.                | 2             | 5      | 7      | 8      | 7       | 100                   | 112        | 116        | none                     | neg.                 | 20            | 19     | 22     | 24     | 32      | none               | neg.                     |
| 1979          | m                          | neg.                     | 12,7        | pos.                | 13            | 16     | 12     | 12     | 9       | 118                   | 125        | 88         | none                     | neg.                 | 10            | 24     | 20     | 13     | 8       | none               | neg.                     |
| 1964          | m                          | neg.                     | 12,5        | pos.                | 6             | 10     | 7      | 4      | 5       | 107                   | 108        | 109        | none                     | neg.                 | 13            | 10     | 9      | 8      | 7       | none               | neg.                     |
| 1993          | m                          | neg.                     | 17,1        | pos.                | 7             | 5      | 4      | 5      | 5       | 134                   | 134        | 121        | diarrhea                 | neg.                 | 11            | 8      | 10     | 8      | 7       | fullness           | neg.                     |
| 1967          | w                          | neg.                     | 15,1        | pos.                | 14            | 11     | 8      | 5      | 5       | 110                   | 113        | 104        | none                     | neg.                 | 14            | 18     | 13     | 10     | 10      | none               | neg.                     |
| 1982          | w                          | neg.                     | 17,9        | pos.                | 5             | 4      | 3      | 2      | 2       | 107                   | 105        | 101        | none                     | neg.                 | 4             | 5      | 3      | 2      | 1       | headache           | neg.                     |
| 1972          | w                          | neg.                     | 16          | pos.                | 15            | 11     | 7      | 6      | 8       | 123                   | 127        | 104        | none                     | neg.                 | 2             | 2      | 3      | 3      | 2       | none               | neg.                     |
| 2003          | m                          | neg.                     | 17,3        | pos.                | 3             | 5      | 5      | 11     | 11      | 103                   | 105        | 97         | abdominal pain           | neg.                 | 19            | 12     | 13     | 10     | 10      | none               | neg.                     |
| 1963          | w                          | neg.                     | 17,7        | pos.                | 5             | 8      | 5      | 2      | 1       | 100                   | 103        | 90         | abdominal pain           | neg.                 | 3             | 3      | 2      | 3      | 3       | none               | neg.                     |
| 2002          | m                          | neg.                     | 16,5        | pos.                | 9             | 6      | 3      | 2      | 3       | 96                    | 90         | 79         | headache                 | neg.                 | 7             | 13     | 7      | 11     | 5       | none               | neg.                     |
| 1986          | w                          | neg.                     | 30,6        | pos.                | 17            | 9      | 6      | 4      | 4       | 95                    | 93         | 88         | none                     | neg.                 | 1             | 12     | 7      | 9      | 6       | diarrhea, headache | neg.                     |
| 1993          | m                          | neg.                     | 80          | pos.                | 11            | 13     | 9      | 8      | 9       | 114                   | 93         | 102        | abdominal pain           | neg.                 | 13            | 19     | 15     | 12     | 12      | none               | neg.                     |
| 1973          | m                          | neg.                     | 25,8        | pos.                | 1             | 2      | 2      | 2      | 2       | 127                   | 127        | 127        | diarrhea                 | neg.                 | 8             | 5      | 6      | 6      | 8       | none               | neg.                     |
| 1993          | w                          | neg.                     | 16,6        | pos.                | 12            | 12     | 6      | 6      | 6       | 88                    | 97         | 89         | none                     | neg.                 | 5             | 4      | 4      | 4      | 3       | rumbling           | neg.                     |
| 1978          | m                          | neg.                     | 37,1        | pos.                | 1             | 2      | 1      | 1      | 4       | 110                   | 118        | 106        | abdominal pain           | neg.                 | 6             | 7      | 4      | 5      | 7       | abdominal pain     | neg.                     |

| Year of birth | Gender w (female) m (male) | <i>H. pylori</i> (IU/mL) | DAO (IU/mL) | Lactose breath test | Fasting (ppm) | 30 Min | 60 Min | 90 Min | 120 Min | Blood glucose fasting | BG 1 (mg%) | BG 2 (mg%) | Symptoms                           | Fructose breath test | Fasting (ppm) | 30 Min | 60 Min | 90 Min | 120 Min | Symptoms | Tissue trans-glutaminase |
|---------------|----------------------------|--------------------------|-------------|---------------------|---------------|--------|--------|--------|---------|-----------------------|------------|------------|------------------------------------|----------------------|---------------|--------|--------|--------|---------|----------|--------------------------|
| 1988          | w                          | neg.                     | 33          | pos.                | 12            | 15     | 15     | 20     | 15      | 109                   | 119        | 118        | bloating, vertigo                  | neg.                 | 15            | 15     | 17     | 19     | 14      | nausea   | neg.                     |
| 1982          | w                          | neg.                     | 11          | pos.                | 14            | 2      | 0      | 0      | 0       | 107                   | 99         | 94         | abdominal pain, bloating, diarrhea | neg.                 | 5             | 4      | 9      | 1      | 0       | none     | neg.                     |
| 1969          | m                          | neg.                     | 25          | pos.                | 2             | 2      | 1      | 2      | 1       | 105                   | 113        | 90         | abdominal pain                     | neg.                 | 3             | 3      | 3      | 2      | 1       | none     | neg.                     |
| 1981          | m                          | neg.                     | 12,5        | pos.                | 4             | 2      | 0      | 1      | 3       | 95                    | 80         | 72         | none                               | neg.                 | 3             | 3      | 2      | 2      | 2       | none     | neg.                     |
| 1997          | w                          | neg.                     | 11,2        | pos.                | 6             | 5      | 6      | 2      | 0       | 84                    | 88         | 79         | nausea                             | neg.                 | 9             | 10     | 6      | 3      | 0       | none     | neg.                     |
| 1984          | m                          | neg.                     | 24,9        | pos.                | 12            | 10     | 0      | 0      | 4       | 105                   | 79         | 89         | none                               | neg.                 | 12            | 8      | 2      | 19     | 13      | none     | neg.                     |
| 2005          | w                          | neg.                     | 12,1        | pos.                | 4             | 8      | 1      | 2      | 2       | 85                    | 95         | 87         | none                               | neg.                 | 6             | 1      | 1      | 2      | 1       | none     | neg.                     |
| 1973          | w                          | neg.                     | 13,2        | pos.                | 5             | 5      | 8      | 6      | 7       | 94                    | 97         | 87         | none                               | neg.                 | 6             | 4      | 3      | 0      | 0       | none     | neg.                     |
| 1991          | m                          | neg.                     | 13,2        | pos.                | 6             | 30     | 82     | 157    | 151     | 93                    | 96         | 96         | nausea, vertigo                    | neg.                 | 13            | 16     | 10     | 10     | 9       | none     | neg.                     |
| 1985          | m                          | neg.                     | 12,7        | pos.                | 13            | 29     | 47     | 0      | 0       | 83                    | 89         | 87         | tired                              | neg.                 | 19            | 20     | 16     | 23     | 20      | none     | neg.                     |
| 1989          | w                          | neg.                     | 25,8        | pos.                | 14            | 0      | 0      | 0      | 0       | 78                    | 91         | 90         | abdominal pain                     | neg.                 | 10            | 12     | 8      | 3      | 6       | none     | neg.                     |
| 1999          | m                          | neg.                     | 13,4        | pos.                | 4             | 5      | 7      | 3      | 2       | 102                   | 118        | 97         | none                               | neg.                 | 1             | 3      | 10     | 0      | 0       | none     | neg.                     |
| 2001          | w                          | neg.                     | 13          | pos.                | 5             | 9      | 5      | 3      | 2       | 102                   | 89         | 95         | nausea, heartburn                  | neg.                 | 4             | 9      | 12     | 13     | 6       | none     | neg.                     |
| 1967          | w                          | neg.                     | 11,3        | pos.                | 4             | 9      | 5      | 4      | 4       | 109                   | 100        | 94         | none                               | neg.                 | 5             | 5      | 9      | 7      | 5       | none     | neg.                     |
| 1966          | m                          | neg.                     | 19,9        | pos.                | 7             | 13     | 4      | 10     | 3       | 118                   | 108        | 119        | none                               | neg.                 | 10            | 3      | 22     | 1      | 0       | none     | neg.                     |
| 1980          | m                          | neg.                     | 13,4        | pos.                | 15            | 14     | 15     | 13     | 11      | 113                   | 130        | 110        | none                               | neg.                 | 9             | 7      | 23     | 19     | 10      | rumbling | neg.                     |
| 1981          | w                          | neg.                     | 10,7        | pos.                | 4             | 2      | 8      | 0      | 0       | 93                    | 112        | 99         | none                               | neg.                 | 3             | 0      | 0      | 0      | 0       | none     | neg.                     |
| 1946          | m                          | neg.                     | 12,5        | pos.                | 0             | 0      | 0      | 0      | 0       | 120                   | 137        | 112        | none                               | neg.                 | 6             | 4      | 0      | 0      | 0       | none     | neg.                     |
| 1954          | m                          | neg.                     | 17,9        | pos.                | 8             | 5      | 57     | 74     | 76      | 131                   | 176        | 170        | bloating                           | neg.                 | 2             | 8      | 6      | 7      | 2       | none     | neg.                     |
| 1954          | w                          | neg.                     | 11          | pos.                | 10            | 11     | 7      | 5      | 4       | 94                    | 106        | 111        | none                               | neg.                 | 7             | 4      | 5      | 4      | 4       | none     | neg.                     |
| 1960          | w                          | neg.                     | 30,9        | pos.                | 3             | 4      | 128    | 240    | 298     | 114                   | 106        | 113        | rumbling                           | neg.                 | 3             | 4      | 6      | 10     | 14      | none     | neg.                     |
| 1966          | m                          | neg.                     | 37,6        | pos.                | 10            | 3      | 35     | 149    | 118     | 100                   | 105        | 106        | none                               | neg.                 | 3             | 9      | 7      | 20     | 9       | none     | neg.                     |
| 1971          | m                          | neg.                     | 24          | pos.                | 4             | 7      | 5      | 3      | 5       | 114                   | 122        | 122        | none                               | neg.                 | 3             | 2      | 10     | 10     | 8       | none     | neg.                     |

| Year of birth | Gender<br>w (female)<br>m (male) | <i>H. pylori</i><br>(IU/mL) | DAO<br>(IU/mL) | Lactose<br>breath<br>test | Fasting<br>(ppm) | 30<br>Min | 60<br>Min | 90<br>Min | 120<br>Min | Blood<br>glucose<br>fasting | BG 1<br>(mg%) | BG 2<br>(mg%) | Symptoms | Fructose<br>breath<br>test | Fasting<br>(ppm) | 30<br>Min | 60<br>Min | 90<br>Min | 120<br>Min | Symptoms | Tissue<br>trans-<br>glutaminase |
|---------------|----------------------------------|-----------------------------|----------------|---------------------------|------------------|-----------|-----------|-----------|------------|-----------------------------|---------------|---------------|----------|----------------------------|------------------|-----------|-----------|-----------|------------|----------|---------------------------------|
| 1960          | m                                | neg.                        | 21,3           | pos.                      | 2                | 8         | 27        | 25        | 33         | 99                          | 138           | 108           | none     | neg.                       | 0                | 0         | 3         | 0         | 2          | none     | neg.                            |
| 1983          | w                                | neg.                        | 15,2           | pos.                      | 0                | 2         | 22        | 46        | 23         | 114                         | 119           | 126           | bloating | neg.                       | 3                | 4         | 1         | 0         | 0          | none     | neg.                            |
| 1967          | m                                | neg.                        | 16,5           | pos.                      | 11               | 10        | 14        | 54        | 35         | 109                         | 107           | 90            | none     | neg.                       | 12               | 3         | 3         | 10        | 1          | none     | neg.                            |
| 1960          | w                                | neg.                        | 19             | pos.                      | 3                | 1         | 1         | 1         | 1          | 115                         | 125           | 116           | none     | neg.                       | 1                | 0         | 0         | 0         | 0          | none     | neg.                            |

**Table 10:** Raw data on patients with fructose malabsorption

| Year of birth | Gender<br>w (female)<br>m (male) | <i>H. pylori</i><br>(IU/mL) | DAO<br>(IU/mL) | Lactose<br>breath<br>test | Fasting<br>(ppm) | 30<br>Min | 60<br>Min | 90<br>Min | 120<br>Min | Blood<br>glucose<br>fasting | BG 1<br>(mg%) | BG 2<br>(mg%) | Symptoms         | Fructose<br>breath<br>test | Fasting<br>(ppm) | 30<br>Min | 60<br>Min | 90<br>Min | 120<br>Min | Symptoms                       | Tissue<br>trans-<br>glutaminase |
|---------------|----------------------------------|-----------------------------|----------------|---------------------------|------------------|-----------|-----------|-----------|------------|-----------------------------|---------------|---------------|------------------|----------------------------|------------------|-----------|-----------|-----------|------------|--------------------------------|---------------------------------|
| 1981          | m                                | neg.                        | 29,9           | neg.                      | 9                | 3         | 2         | 4         | 6          | 75                          | 98            | 80            | none             | pos.                       | 2                | 10        | 39        | 42        | 32         | none                           | neg.                            |
| 1967          | w                                | neg.                        | 20,8           | neg.                      | 20               | 16        | 8         | 10        | 13         | 94                          | 108           | 90            | strange<br>taste | pos.                       | 5                | 12        | 23        | 32        | 37         | strange<br>feeling             | neg.                            |
| 1990          | m                                | neg.                        | 13,1           | neg.                      | 1                | 1         | 0         | 1         | 1          | 105                         | 118           | 103           | none             | pos.                       | 1                | 12        | 25        | 27        | 13         | none                           | neg.                            |
| 1970          | w                                | neg.                        | 13             | neg.                      | 1                | 1         | 1         | 1         | 2          | 74                          | 117           | 88            | none             | pos.                       | 14               | 23        | 50        | 103       | 111        | diarrhea,<br>abdominal<br>pain | neg.                            |
| 1930          | m                                | neg.                        | 16,9           | neg.                      | 0                | 1         | 0         | 0         | 0          | 108                         | 163           | 134           | none             | pos.                       | 10               | 22        | 36        | 34        | 21         | none                           | neg.                            |
| 1974          | w                                | neg.                        | 18,3           | neg.                      | 12               | 11        | 4         | 14        | 24         | 83                          | 108           | 95            | none             | pos.                       | 17               | 24        | 62        | 60        | 48         | none                           | neg.                            |
| 1962          | w                                | neg.                        | 16,8           | neg.                      | 1                | 4         | 3         | 2         | 4          | 96                          | 132           | 94            | none             | pos.                       | 0                | 1         | 16        | 15        | 9          | bloating,<br>burning<br>tongue | neg.                            |
| 1987          | w                                | neg.                        | 19,4           | neg.                      | 3                | 1         | 0         | 0         | 5          | 86                          | 130           | 87            | none             | pos.                       | 0                | 5         | 5         | 28        | 52         | fullness,<br>hunger            | neg.                            |
| 1966          | m                                | neg.                        | 18,6           | neg.                      | 3                | 3         | 2         | 2         | 3          | 118                         | 160           | 119           | none             | pos.                       | 4                | 19        | 29        | 26        | 27         | bloating,<br>abdominal<br>pain | neg.                            |
| 1961          | m                                | neg.                        | 10,8           | neg.                      | 1                | 1         | 2         | 2         | 2          | 109                         | 165           | 99            | none             | pos.                       | 0                | 1         | 22        | 10        | 10         | rumbling                       | neg.                            |
| 1943          | m                                | neg.                        | 13,6           | neg.                      | 0                | 1         | 0         | 1         | 1          | 97                          | 120           | 138           | none             | pos.                       | 0                | 3         | 13        | 38        | 26         | none                           | neg.                            |
| 1977          | w                                | neg.                        | 62,5           | neg.                      | 3                | 4         | 4         | 5         | 7          | 92                          | 127           | 104           | none             | pos.                       | 1                | 8         | 16        | 21        | 12         | nausea,<br>abdominal<br>pain   | neg.                            |
| 1948          | m                                | neg.                        | 20,1           | neg.                      | 1                | 2         | 5         | 11        | 13         | 135                         | 176           | 185           | none             | pos.                       | 3                | 6         | 23        | 22        | 16         | none                           | neg.                            |
| 1965          | m                                | neg.                        | 11,3           | neg.                      | 4                | 5         | 3         | 2         | 2          | 102                         | 135           | 129           | none             | pos.                       | 14               | 14        | 28        | 33        | 11         | none                           | neg.                            |
| 1985          | m                                | neg.                        | 25             | neg.                      | 2                | 3         | 2         | 2         | 3          | 92                          | 100           | 106           | none             | pos.                       | 3                | 7         | 29        | 14        | 18         | headache,<br>heartburn         | neg.                            |
| 1977          | m                                | neg.                        | 20,3           | neg.                      | 3                | 2         | 2         | 1         | 1          | 108                         | 119           | 98            | bloating         | pos.                       | 5                | 25        | 18        | 22        | 12         | rumbling                       | neg.                            |
| 1969          | w                                | neg.                        | 18,2           | neg.                      | 5                | 6         | 6         | 8         | 6          | 89                          | 112           | 75            | none             | pos.                       | 13               | 57        | 37        | 56        | 31         | rumbling,<br>bloating          | neg.                            |
| 2002          | m                                | neg.                        | 12,8           | neg.                      | 6                | 7         | 5         | 4         | 5          | 84                          | 108           | 89            | rumbling         | pos.                       | 1                | 2         | 3         | 27        | 15         | diarrhea,<br>abdominal<br>pain | neg.                            |
| 1932          | w                                | neg.                        | 15,3           | neg.                      | 13               | 14        | 22        | 12        | 8          | 136                         | 206           | 153           | none             | pos.                       | 1                | 26        | 32        | 33        | 38         | none                           | neg.                            |
| 1953          | w                                | neg.                        | 21,6           | neg.                      | 1                | 1         | 2         | 1         | 0          | 121                         | 170           | 120           | none             | pos.                       | 3                | 3         | 7         | 31        | 19         | none                           | neg.                            |

| Year of birth | Gender<br>w (female)<br>m (male) | <i>H. pylori</i><br>(IU/mL) | DAO<br>(IU/mL) | Lactose<br>breath<br>test | Fasting<br>(ppm) | 30<br>Min | 60<br>Min | 90<br>Min | 120<br>Min | Blood<br>glucose<br>fasting | BG 1<br>(mg%) | BG 2<br>(mg%) | Symptoms          | Fructose<br>breath<br>test | Fasting<br>(ppm) | 30<br>Min | 60<br>Min | 90<br>Min | 120<br>Min | Symptoms                       | Tissue<br>trans-<br>glutaminase |
|---------------|----------------------------------|-----------------------------|----------------|---------------------------|------------------|-----------|-----------|-----------|------------|-----------------------------|---------------|---------------|-------------------|----------------------------|------------------|-----------|-----------|-----------|------------|--------------------------------|---------------------------------|
| 1988          | m                                | neg.                        | 22,9           | neg.                      | 5                | 4         | 3         | 4         | 9          | 83                          | 105           | 64            | none              | pos.                       | 10               | 32        | 50        | 37        | 30         | none                           | neg.                            |
| 1971          | w                                | neg.                        | 16,1           | neg.                      | 2                | 3         | 2         | 2         | 2          | 99                          | 118           | 92            | belching          | pos.                       | 4                | 14        | 34        | 40        | 38         | nausea,<br>vertigo             | neg.                            |
| 1966          | w                                | neg.                        | 34,1           | neg.                      | 1                | 2         | 2         | 4         | 4          | 85                          | 97            | 97            | none              | pos.                       | 13               | 17        | 35        | 42        | 46         | tiredness,<br>itchy skin       | neg.                            |
| 1945          | w                                | neg.                        | 11,1           | neg.                      | 2                | 3         | 5         | 13        | 21         | 99                          | 164           | 127           | vertigo           | pos.                       | 1                | 17        | 55        | 28        | 20         | rumbling,<br>abdominal<br>pain | neg.                            |
| 1968          | m                                | neg.                        | 40,1           | neg.                      | 1                | 1         | 1         | 1         | 2          | 87                          | 135           | 103           | none              | pos.                       | 11               | 17        | 33        | 32        | 29         | tiredness,<br>itchy skin       | neg.                            |
| 1985          | w                                | neg.                        | 10,4           | neg.                      | 1                | 2         | 1         | 1         | 1          | 107                         | 98            | 122           | none              | pos.                       | 1                | 25        | 38        | 18        | 15         | rumbling,<br>diarrhea          | neg.                            |
| 1961          | m                                | neg.                        | 33,2           | neg.                      | 4                | 4         | 9         | 7         | 8          | 97                          | 136           | 113           | abdominal<br>pain | pos.                       | 8                | 11        | 27        | 45        | 36         | heartburn                      | neg.                            |
| 1974          | w                                | neg.                        | 27,3           | neg.                      | 4                | 6         | 3         | 7         | 14         | 99                          | 162           | 93            | none              | pos.                       | 1                | 8         | 30        | 58        | 40         | none                           | neg.                            |
| 1983          | w                                | neg.                        | 19,1           | neg.                      | 6                | 5         | 5         | 3         | 3          | 97                          | 107           | 96            | nausea            | pos.                       | 1                | 17        | 77        | 30        | 27         | rumbling,<br>bloating          | neg.                            |
| 1994          | w                                | neg.                        | 14,5           | neg.                      | 3                | 5         | 4         | 3         | 4          | 87                          | 107           | 96            | none              | pos.                       | 1                | 4         | 18        | 22        | 11         | nausea                         | neg.                            |
| 1948          | w                                | neg.                        | 17,9           | neg.                      | 3                | 3         | 4         | 3         | 3          | 98                          | 165           | 141           | rumbling          | pos.                       | 1                | 8         | 39        | 26        | 28         | none                           | neg.                            |
| 1985          | w                                | neg.                        | 10,4           | neg.                      | 1                | 2         | 1         | 1         | 1          | 107                         | 98            | 122           | none              | pos.                       | 1                | 25        | 38        | 18        | 15         | heartburn                      | neg.                            |
| 1977          | w                                | neg.                        | 14             | neg.                      | 2                | 2         | 3         | 13        | 9          | 97                          | 112           | 93            | none              | pos.                       | 2                | 2         | 11        | 43        | 74         | rumbling                       | neg.                            |
| 1956          | w                                | neg.                        | 19,2           | neg.                      | 1                | 1         | 1         | 1         | 2          | 104                         | 142           | 113           | none              | pos.                       | 11               | 6         | 8         | 32        | 8          | none                           | neg.                            |
| 1975          | m                                | neg.                        | 18,5           | neg.                      | 1                | 4         | 1         | 1         | 2          | 85                          | 153           | 105           | none              | pos.                       | 2                | 40        | 27        | 25        | 8          | headache,<br>vertigo           | neg.                            |
| 1983          | w                                | neg.                        | 16,8           | neg.                      | 2                | 3         | 2         | 2         | 2          | 107                         | 130           | 98            | none              | pos.                       | 6                | 11        | 28        | 14        | 12         | abdominal<br>pain              | neg.                            |
| 1994          | m                                | neg.                        | 12,7           | neg.                      | 11               | 9         | 8         | 12        | 12         | 108                         | 128           | 114           | nausea            | pos.                       | 10               | 23        | 51        | 34        | 20         | rumbling                       | neg.                            |
| 1987          | m                                | neg.                        | 19,4           | neg.                      | 8                | 11        | 13        | 16        | 24         | 98                          | 122           | 101           | none              | pos.                       | 3                | 27        | 21        | 12        | 13         | abdominal<br>pain              | neg.                            |
| 1959          | m                                | neg.                        | 47,1           | neg.                      | 6                | 5         | 6         | 6         | 5          | 121                         | 154           | 125           | none              | pos.                       | 6                | 29        | 26        | 10        | 11         | none                           | neg.                            |
| 1975          | w                                | neg.                        | 22,1           | neg.                      | 5                | 13        | 5         | 4         | 5          | 86                          | 137           | 116           | none              | pos.                       | 11               | 18        | 49        | 34        | 19         | rumbling                       | neg.                            |
| 1950          | w                                | neg.                        | 21,4           | neg.                      | 1                | 2         | 1         | 0         | 1          | 97                          | 121           | 128           | none              | pos.                       | 4                | 9         | 63        | 89        | 104        | none                           | neg.                            |
| 1996          | w                                | neg.                        | 34,1           | neg.                      | 11               | 8         | 8         | 8         | 8          | 90                          | 135           | 104           | none              | pos.                       | 2                | 3         | 18        | 29        | 24         | none                           | neg.                            |
| 1949          | w                                | neg.                        | 10,2           | neg.                      | 16               | 16        | 14        | 12        | 8          | 184                         | 273           | 263           | none              | pos.                       | 15               | 37        | 80        | 21        | 14         | rumbling                       | neg.                            |

| Year of birth | Gender<br>w (female)<br>m (male) | <i>H. pylori</i><br>(IU/mL) | DAO<br>(IU/mL) | Lactose<br>breath<br>test | Fasting<br>(ppm) | 30<br>Min | 60<br>Min | 90<br>Min | 120<br>Min | Blood<br>glucose<br>fasting | BG 1<br>(mg%) | BG 2<br>(mg%) | Symptoms                       | Fructose<br>breath<br>test | Fasting<br>(ppm) | 30<br>Min | 60<br>Min | 90<br>Min | 120<br>Min | Symptoms                       | Tissue<br>trans-<br>glutaminase |
|---------------|----------------------------------|-----------------------------|----------------|---------------------------|------------------|-----------|-----------|-----------|------------|-----------------------------|---------------|---------------|--------------------------------|----------------------------|------------------|-----------|-----------|-----------|------------|--------------------------------|---------------------------------|
| 1991          | m                                | neg.                        | 12,5           | neg.                      | 11               | 7         | 8         | 6         | 5          | 111                         | 130           | 116           | abdominal<br>pain,<br>bloating | pos.                       | 13               | 16        | 57        | 38        | 26         | bloating,<br>rumbling          | neg.                            |
| 1977          | m                                | neg.                        | 18             | neg.                      | 3                | 3         | 2         | 2         | 3          | 107                         | 126           | 102           | none                           | pos.                       | 8                | 10        | 26        | 33        | 16         | none                           | neg.                            |
| 1952          | w                                | neg.                        | 26,7           | neg.                      | 3                | 3         | 5         | 11        | 19         | 120                         | 171           | 123           | nausea,<br>vertigo             | pos.                       | 4                | 15        | 79        | 76        | 62         | rumbling                       | neg.                            |
| 1988          | w                                | neg.                        | 19,8           | neg.                      | 17               | 11        | 13        | 9         | 10         | 82                          | 99            | 109           | none                           | pos.                       | 5                | 3         | 3         | 3         | 39         | none                           | neg.                            |
| 1957          | w                                | neg.                        | 20,1           | neg.                      | 12               | 14        | 11        | 10        | 13         | 97                          | 151           | 106           | none                           | pos.                       | 5                | 9         | 7         | 48        | 146        | none                           | neg.                            |
| 1988          | w                                | neg.                        | 37,1           | neg.                      | 13               | 18        | 14        | 13        | 11         | 93                          | 159           | 106           | none                           | pos.                       | 7                | 18        | 63        | 56        | 46         | rumbling,<br>bloating          | neg.                            |
| 1984          | w                                | neg.                        | 36,1           | neg.                      | 2                | 3         | 10        | 18        | 21         | 102                         | 113           | 100           | headache                       | pos.                       | 2                | 2         | 10        | 21        | 23         | none                           | neg.                            |
| 1956          | w                                | neg.                        | 15,1           | neg.                      | 2                | 3         | 3         | 3         | 2          | 103                         | 144           | 108           | none                           | pos.                       | 1                | 13        | 30        | 26        | 6          | none                           | neg.                            |
| 1967          | w                                | neg.                        | 16,3           | neg.                      | 2                | 2         | 2         | 3         | 2          | 101                         | 141           | 136           | none                           | pos.                       | 4                | 8         | 29        | 18        | 18         | none                           | neg.                            |
| 1956          | w                                | neg.                        | 15,1           | neg.                      | 2                | 3         | 3         | 3         | 2          | 103                         | 144           | 108           | none                           | pos.                       | 1                | 13        | 30        | 26        | 6          | none                           | neg.                            |
| 2001          | m                                | neg.                        | 16,3           | neg.                      | 5                | 3         | 5         | 4         | 4          | 78                          | 126           | 108           | none                           | pos.                       | 9                | 13        | 57        | 22        | 31         | none                           | neg.                            |
| 1985          | w                                | neg.                        | 15,4           | neg.                      | 2                | 4         | 4         | 3         | 3          | 84                          | 137           | 136           | none                           | pos.                       | 10               | 9         | 45        | 36        | 29         | headache,<br>abdominal<br>pain | neg.                            |
| 1962          | m                                | neg.                        | 15             | neg.                      | 2                | 7         | 11        | 11        | 11         | 105                         | 129           | 108           | none                           | pos.                       | 2                | 33        | 36        | 33        | 28         | none                           | neg.                            |
| 1993          | m                                | neg.                        | 20,1           | neg.                      | 7                | 6         | 6         | 5         | 4          | 84                          | 121           | 92            | none                           | pos.                       | 16               | 30        | 47        | 68        | 60         | stomach<br>pain                | neg.                            |
| 1992          | m                                | neg.                        | 14,4           | neg.                      | 12               | 10        | 13        | 7         | 12         | 102                         | 135           | 102           | none                           | pos.                       | 7                | 11        | 38        | 55        | 64         | rumbling                       | neg.                            |
| 1969          | w                                | neg.                        | 12,2           | neg.                      | 8                | 7         | 7         | 8         | 7          | 95                          | 125           | 111           | none                           | pos.                       | 10               | 31        | 23        | 10        | 15         | eczema                         | neg.                            |
| 1987          | m                                | neg.                        | 18,6           | neg.                      | 5                | 9         | 7         | 4         | 2          | 93                          | 152           | 92            | none                           | pos.                       | 7                | 17        | 47        | 25        | 22         | rumbling,<br>fullness          | neg.                            |
| 1989          | w                                | neg.                        | 13,6           | neg.                      | 7                | 8         | 5         | 7         | 6          | 85                          | 175           | 95            | none                           | pos.                       | 25               | 54        | 59        | 54        | 26         | none                           | neg.                            |
| 1995          | w                                | neg.                        | 11,7           | neg.                      | 12               | 15        | 11        | 9         | 8          | 90                          | 111           | 86            | none                           | pos.                       | 18               | 26        | 48        | 71        | 58         | belching,<br>nausea            | neg.                            |
| 1977          | w                                | neg.                        | 12,4           | neg.                      | 11               | 16        | 19        | 19        | 13         | 94                          | 125           | 81            | none                           | pos.                       | 18               | 24        | 37        | 46        | 38         | none                           | neg.                            |
| 1941          | w                                | neg.                        | 19,7           | neg.                      | 19               | 24        | 21        | 23        | 19         | 155                         | 229           | 149           | none                           | pos.                       | 21               | 35        | 68        | 98        | 52         | none                           | neg.                            |
| 1956          | w                                | neg.                        | 15,5           | neg.                      | 18               | 20        | 15        | 17        | 10         | 94                          | 118           | 85            | none                           | pos.                       | 0                | 13        | 31        | 40        | 31         | none                           | neg.                            |
| 1982          | w                                | neg.                        | 15,8           | neg.                      | 0                | 0         | 0         | 0         | 3          | 84                          | 125           | 79            | none                           | pos.                       | 4                | 1         | 53        | 49        | 18         | none                           | neg.                            |
| 1996          | w                                | neg.                        | 18             | neg.                      | 0                | 0         | 0         | 0         | 0          | 87                          | 129           | 113           | none                           | pos.                       | 5                | 0         | 9         | 30        | 23         | bloating                       | neg.                            |



| Year of birth | Gender<br>w (female)<br>m (male) | <i>H. pylori</i><br>(IU/mL) | DAO<br>(IU/mL) | Lactose<br>breath<br>test | Fasting<br>(ppm) | 30<br>Min | 60<br>Min | 90<br>Min | 120<br>Min | Blood<br>glucose<br>fasting | BG 1<br>(mg%) | BG 2<br>(mg%) | Symptoms               | Fructose<br>breath<br>test | Fasting<br>(ppm) | 30<br>Min | 60<br>Min | 90<br>Min | 120<br>Min | Symptoms                       | Tissue<br>trans-<br>glutaminase |
|---------------|----------------------------------|-----------------------------|----------------|---------------------------|------------------|-----------|-----------|-----------|------------|-----------------------------|---------------|---------------|------------------------|----------------------------|------------------|-----------|-----------|-----------|------------|--------------------------------|---------------------------------|
| 1952          | w                                | neg.                        | 14,5           | neg.                      | 17               | 27        | 19        | 29        | 32         | 103                         | 157           | 95            | none                   | pos.                       | 5                | 4         | 13        | 21        | 30         | none                           | neg.                            |
| 1982          | m                                | neg.                        | 11,3           | neg.                      | 5                | 3         | 6         | 0         | 1          | 103                         | 141           | 96            | none                   | pos.                       | 8                | 5         | 37        | 33        | 23         | none                           | neg.                            |
| 1952          | w                                | neg.                        | 18,4           | neg.                      | 7                | 2         | 0         | 0         | 0          | 105                         | 157           | 122           | none                   | pos.                       | 3                | 0         | 0         | 0         | 24         | none                           | neg.                            |
| 1952          | m                                | neg.                        | 14,2           | neg.                      | 8                | 4         | 0         | 0         | 0          | 101                         | 172           | 121           | vertigo                | pos.                       | 0                | 1         | 71        | 10        | 5          | rumbling,<br>diarrhea          | neg.                            |
| 1989          | m                                | neg.                        | 12,8           | neg.                      | 0                | 0         | 0         | 0         | 0          | 109                         | 120           | 105           | none                   | pos.                       | 8                | 6         | 5         | 16        | 29         | nausea                         | neg.                            |
| 1996          | w                                | neg.                        | 15,2           | neg.                      | 1                | 2         | 1         | 1         | 2          | 104                         | 128           | 80            | none                   | pos.                       | 5                | 16        | 17        | 35        | 16         | none                           | neg.                            |
| 1969          | w                                | neg.                        | 24,8           | neg.                      | 0                | 1         | 3         | 3         | 9          | 86                          | 156           | 119           | none                   | pos.                       | 0                | 12        | 27        | 19        | 10         | abdominal<br>pain              | neg.                            |
| 1965          | w                                | neg.                        | 12,9           | neg.                      | 1                | 2         | 2         | 4         | 17         | 91                          | 145           | 97            | none                   | pos.                       | 1                | 3         | 25        | 59        | 68         | fullness,<br>headache          | neg.                            |
| 1969          | w                                | neg.                        | 24,8           | neg.                      | 0                | 1         | 3         | 3         | 9          | 86                          | 156           | 119           | none                   | pos.                       | 0                | 12        | 27        | 19        | 10         | abdominal<br>pain              | neg.                            |
| 1972          | w                                | neg.                        | 12,8           | neg.                      | 10               | 18        | 17        | 18        | 14         | 94                          | 112           | 101           | none                   | pos.                       | 4                | 15        | 74        | 59        | 66         | abdominal<br>pain              | neg.                            |
| 1990          | w                                | neg.                        | 26,3           | neg.                      | 0                | 0         | 9         | 8         | 4          | 87                          | 125           | 105           | bloating               | pos.                       | 0                | 0         | 17        | 27        | 8          | none                           | neg.                            |
| 1979          | w                                | neg.                        | 23,5           | neg.                      | 0                | 0         | 7         | 5         | 3          | 103                         | 126           | 76            | heartburn,<br>fullness | pos.                       | 10               | 31        | 39        | 22        | 14         | heartburn,<br>belching         | neg.                            |
| 1988          | w                                | neg.                        | 11,5           | neg.                      | 0                | 0         | 0         | 0         | 0          | 95                          | 130           | 73            | none                   | pos.                       | 11               | 45        | 90        | 66        | 37         | fullness                       | neg.                            |
| 1984          | m                                | neg.                        | 14,8           | neg.                      | 4                | 5         | 4         | 0         | 2          | 99                          | 123           | 86            | none                   | pos.                       | 8                | 13        | 44        | 50        | 18         | tired                          | neg.                            |
| 1996          | m                                | neg.                        | 16,6           | neg.                      | 0                | 2         | 3         | 1         | 0          | 96                          | 122           | 77            | none                   | pos.                       | 9                | 25        | 59        | 66        | 102        | rumbling                       | neg.                            |
| 1995          | m                                | neg.                        | 15,4           | neg.                      | 11               | 16        | 16        | 11        | 13         | 76                          | 133           | 95            | none                   | pos.                       | 8                | 199       | 88        | 67        | 38         | diarrhea,<br>vertigo, pain     | neg.                            |
| 1968          | w                                | neg.                        | 22             | neg.                      | 0                | 0         | 0         | 0         | 0          | 97                          | 111           | 95            | none                   | pos.                       | 1                | 10        | 17        | 47        | 30         | rumbling,<br>abdominal<br>pain | neg.                            |
| 1960          | w                                | neg.                        | 34,5           | neg.                      | 7                | 8         | 8         | 4         | 4          | 99                          | 151           | 85            | none                   | pos.                       | 0                | 3         | 4         | 4         | 24         | tired                          | neg.                            |
| 1958          | m                                | neg.                        | 12,4           | neg.                      | 0                | 0         | 0         | 0         | 0          | 101                         | 152           | 143           | none                   | pos.                       | 1                | 32        | 43        | 18        | 10         | abdominal<br>pain, nausea      | neg.                            |
| 1995          | m                                | neg.                        | 13,9           | neg.                      | 9                | 2         | 3         | 1         | 0          | 96                          | 112           | 83            | none                   | pos.                       | 3                | 27        | 60        | 60        | 29         | diarrhea                       | neg.                            |
| 1944          | w                                | neg.                        | 25             | neg.                      | 0                | 0         | 0         | 0         | 0          | 114                         | 145           | 122           | none                   | pos.                       | 0                | 0         | 44        | 66        | 16         | none                           | neg.                            |
| 1978          | w                                | neg.                        | 20,6           | neg.                      | 1                | 3         | 2         | 3         | 7          | 86                          | 138           | 101           | headache               | pos.                       | 6                | 39        | 44        | 20        | 16         | none                           | neg.                            |
| 1943          | m                                | neg.                        | 16,2           | neg.                      | 1                | 4         | 3         | 2         | 6          | 118                         | 165           | 113           | none                   | pos.                       | 5                | 7         | 32        | 46        | 27         | none                           | neg.                            |

| Year of birth | Gender<br>w (female)<br>m (male) | <i>H. pylori</i><br>(IU/mL) | DAO<br>(IU/mL) | Lactose<br>breath<br>test | Fasting<br>(ppm) | 30<br>Min | 60<br>Min | 90<br>Min | 120<br>Min | Blood<br>glucose<br>fasting | BG 1<br>(mg%) | BG 2<br>(mg%) | Symptoms | Fructose<br>breath<br>test | Fasting<br>(ppm) | 30<br>Min | 60<br>Min | 90<br>Min | 120<br>Min | Symptoms                       | Tissue<br>trans-<br>glutaminase |
|---------------|----------------------------------|-----------------------------|----------------|---------------------------|------------------|-----------|-----------|-----------|------------|-----------------------------|---------------|---------------|----------|----------------------------|------------------|-----------|-----------|-----------|------------|--------------------------------|---------------------------------|
| 2001          | w                                | neg.                        | 12,4           | neg.                      | 5                | 2         | 0         | 3         | 8          | 90                          | 134           | 68            | none     | pos.                       | 4                | 11        | 57        | 57        | 36         | abdominal<br>pain,<br>bloating | neg.                            |
| 1994          | w                                | neg.                        | 10,6           | neg.                      | 7                | 4         | 6         | 10        | 3          | 83                          | 127           | 83            | none     | pos.                       | 1                | 9         | 23        | 9         | 0          | none                           | neg.                            |
| 1945          | w                                | neg.                        | 12,8           | neg.                      | 0                | 1         | 3         | 3         | 9          | 98                          | 153           | 122           | none     | pos.                       | 1                | 3         | 57        | 106       | 103        | none                           | neg.                            |
| 2001          | w                                | neg.                        | 22,6           | neg.                      | 12               | 13        | 11        | 3         | 1          | 90                          | 133           | 92            | none     | pos.                       | 11               | 5         | 16        | 42        | 20         | none                           | neg.                            |
| 1956          | w                                | neg.                        | 15,5           | neg.                      | 2                | 2         | 3         | 2         | 4          | 171                         | 193           | 163           | none     | pos.                       | 0                | 1         | 13        | 31        | 45         | diarrhea                       | neg.                            |
| 1993          | w                                | neg.                        | 18,7           | neg.                      | 16               | 29        | 21        | 17        | 17         | 77                          | 112           | 95            | nausea   | pos.                       | 17               | 35        | 62        | 64        | 60         | none                           | neg.                            |
| 1989          | m                                | neg.                        | 10,9           | neg.                      | 2                | 6         | 6         | 1         | 9          | 101                         | 148           | 89            | none     | pos.                       | 4                | 41        | 22        | 11        | 7          | dyspnea                        | neg.                            |
| 2000          | w                                | neg.                        | 15,6           | neg.                      | 2                | 6         | 17        | 6         | 1          | 111                         | 140           | 107           | none     | pos.                       | 9                | 4         | 32        | 19        | 13         | none                           | neg.                            |
| 1982          | w                                | neg.                        | 29,3           | neg.                      | 10               | 25        | 19        | 16        | 4          | 131                         | 188           | 120           | none     | pos.                       | 12               | 49        | 43        | 21        | 28         | bloating                       | neg.                            |
| 1950          | w                                | neg.                        | 16,2           | neg.                      | 1                | 7         | 12        | 4         | 6          | 102                         | 136           | 106           | none     | pos.                       | 0                | 25        | 29        | 19        | 13         | none                           | neg.                            |
| 1969          | m                                | neg.                        | 25,2           | neg.                      | 4                | 6         | 15        | 14        | 16         | 117                         | 145           | 117           | none     | pos.                       | 11               | 8         | 28        | 44        | 24         | none                           | neg.                            |
| 1961          | w                                | neg.                        | 13,4           | neg.                      | 9                | 14        | 16        | 11        | 13         | 137                         | 169           | 106           | none     | pos.                       | 1                | 6         | 69        | 72        | 21         | diarrhea                       | neg.                            |
